# Small subpopulations of $\beta$ -cells do not drive islet oscillatory $[Ca^{2+}]$ dynamics via gap junction communication

JaeAnn M. Dwulet<sup>1</sup>, Jennifer K. Briggs<sup>1</sup>, Richard K.P. Benninger<sup>1,2,\*</sup>

<sup>1</sup>Department of Bioengineering, University of Colorado, Anschutz Medical campus, Aurora, Colorado, United States of America

<sup>2</sup>Barbara Davis center for childhood diabetes, University of Colorado, Anschutz Medical campus, Aurora, Colorado, United States of America

\*Corresponding author

Email: [richard.benninger@cuanschutz.edu](mailto:richard.benninger@cuanschutz.edu) (RKPB)

**Running title:** Small  $\beta$ -cell populations cannot drive islet  $Ca^{2+}$

1  
2

## 3 **Abstract**

4

5 The islets of Langerhans exist as a multicellular network that is important for the regulation of blood  
6 glucose levels. The majority of cells in the islet are insulin-producing  $\beta$ -cells, which are excitable cells  
7 that are electrically coupled via gap junction channels.  $\beta$ -cells have long been known to display  
8 heterogeneous functionality. However, due to gap junction electrical coupling,  $\beta$ -cells show  
9 coordinated  $[Ca^{2+}]$  oscillations when stimulated with glucose, and global quiescence when  
10 unstimulated. Small subpopulations of highly functional  $\beta$ -cells have been suggested to control the  
11 dynamics of  $[Ca^{2+}]$  and insulin release across the islet. In this study, we investigated the theoretical  
12 basis of whether small subpopulations of  $\beta$ -cells can disproportionality control islet  $[Ca^{2+}]$  dynamics.  
13 Using a multicellular model of the islet, we generated continuous or bimodal distributions of  $\beta$ -cell  
14 heterogeneity and examined how islet  $[Ca^{2+}]$  dynamics depended on the presence of cells with  
15 increased excitability or increased oscillation frequency. We found that the islet was susceptible to  
16 marked suppression of  $[Ca^{2+}]$  when a  $\sim 10\%$  population of cells with high metabolic activity was  
17 hyperpolarized; where hyperpolarizing cells with normal metabolic activity had little effect. However,  
18 when these highly metabolic cells were removed from the islet model, near normal  $[Ca^{2+}]$  remained.  
19 Similarly, when  $\sim 10\%$  of cells with either the highest frequency or earliest elevations in  $[Ca^{2+}]$  were  
20 removed from the islet, the  $[Ca^{2+}]$  oscillation frequency remained largely unchanged. Overall these  
21 results indicate that small populations of  $\beta$ -cells with either increased excitability or increased  
22 frequency, or signatures of  $[Ca^{2+}]$  dynamics that suggest such properties, are unable to  
23 disproportionately control islet-wide  $[Ca^{2+}]$  via gap junction coupling. As such, we need to reconsider  
24 the physiological basis for such small  $\beta$ -cell populations or the mechanism by which they may be  
25 acting to control normal islet function.

26

27

## 28 **Author summary**

29

30 Many biological systems can be studied using network theory. How heterogeneous cell subpopulations  
31 come together to create complex multicellular behavior is of great value in understanding function and  
32 dysfunction in tissues. The pancreatic islet of Langerhans is a highly coupled structure that is important  
33 for maintaining blood glucose homeostasis.  $\beta$ -cell electrical activity is coordinated via gap junction  
34 communication. The function of the insulin-producing  $\beta$ -cell within the islet is disrupted in diabetes.  
35 As such, to understand the causes of islet dysfunction we need to understand how different cells within  
36 the islet contribute to its overall function via gap junction coupling. Using a computational model of  $\beta$ -  
37 cell electrophysiology, we investigated how small highly functional  $\beta$ -cell populations within the islet  
38 contribute to its function. We found that when small populations with greater functionality were  
39 introduced into the islet, they displayed signatures of this enhanced functionality. However, when these  
40 cells were removed, the islet, retained near-normal function. Thus, in a highly coupled system, such as  
41 an islet, the heterogeneity of cells allows small subpopulations to be dispensable, and thus their  
42 absence is unable to disrupt the larger cellular network. These findings can be applied to other  
43 electrical systems that have heterogeneous cell populations.

44



## 46 Introduction

47

48 Many tissues exist as multicellular networks that have complex structures and functions. Multicellular  
49 networks are generally comprised of heterogenous cell populations, and heterogeneity in cellular  
50 function makes it difficult to understand the underlying network behavior. Studying the constituent  
51 cells individually is of value. However, understanding how heterogeneous cell populations come  
52 together to form a coherent structure with emergent properties is important to understand what leads to  
53 dysfunction in these networks [1]. The multicellular pancreatic islet lends itself to network theory with  
54 its distinct architecture, cellular heterogeneity, and cell-cell interactions.

55 The pancreatic islet is a micro-organ that helps maintain blood glucose homeostasis [2]. Death or  
56 dysfunction to insulin-secreting  $\beta$ -cells within the islet generally causes diabetes [3]. When blood  
57 glucose levels rise, glucose is transported into the  $\beta$ -cell and phosphorylated by glucokinase (GK), the  
58 rate limiting step of glycolysis [4-6]. Following glucose metabolism, the ratio of ATP/ADP increases,  
59 closing ATP sensitive  $K^+$  channels ( $K_{ATP}$ ).  $K_{ATP}$  channel closure causes membrane depolarization,  
60 opening voltage gated  $Ca^{2+}$  channels and elevating intra-cellular free-calcium ( $[Ca^{2+}]$ ); which triggers  
61 insulin granule fusion and insulin release [7, 8]. Disruptions to this glucose stimulated insulin secretion  
62 pathway occur in diabetes [9-11].  $\beta$ -cells are electrically coupled by connexin36 (Cx36) gap junctions  
63 which can transmit depolarizing currents across the islet that synchronize oscillations in  $[Ca^{2+}]$ . Under  
64 low glucose conditions, gap junctions transmit hyperpolarizing currents that suppress islet electrical  
65 activity [12-15]. Understanding the role cell-cell communication between  $\beta$ -cells plays can increase  
66 our understanding of dysfunction to islet dynamics during the pathogenesis of diabetes.

67 Despite their robust coordinated behavior within the intact islet,  $\beta$ -cells are functionally  
68 heterogeneous [16]. Individual  $\beta$ -cells show heterogeneity in expression of GK [17], glucose  
69 metabolism [16], differing levels of insulin production and secretion [18-21], and faster and irregular  
70  $[Ca^{2+}]$  oscillations when compared to whole islet oscillations [22]. Various cell surface and protein  
71 markers have been used to identify subpopulations of  $\beta$ -cells with differences in functionality and  
72 proliferative capacity [23-27]. Nevertheless, the importance of  $\beta$ -cell heterogeneity and how these  
73 subpopulations contribute to islet function is poorly understood.

74 While many studies of  $\beta$ -cell heterogeneity have been performed in dissociated cells, a few studies  
75 have investigated the role of heterogeneity in the intact islet [28]. In one study, following stimulation  
76 via the optogenetic cationic channel channelrhodopsin (ChR2),  $\sim 10\%$  of  $\beta$ -cells were found to be  
77 highly excitable and able to recruit  $[Ca^{2+}]$  elevations in large regions in the islet. These highly excitable  
78 cells had higher metabolic activity [29]. In another study, the optogenetic  $Cl^-$  pump halorhodopsin  
79 (eNpHr3) was used to silence  $\beta$ -cells. A population of  $\sim 1-10\%$  “hub”  $\beta$ -cells was discovered that when  
80 hyperpolarized by eNpHr3 substantially disrupted coordinated  $[Ca^{2+}]$  dynamics across the islet. These  
81 cells had increased GK expression [30]. In related studies, a small population of cells showed  $[Ca^{2+}]$   
82 oscillations that consistently preceded the rest of the islet and were suggested to be ‘pacemaker cells’  
83 that drove islet  $[Ca^{2+}]$  dynamics [31]. Theoretically, how small subpopulations of cells may be capable  
84 of driving elevations and oscillatory dynamics of  $[Ca^{2+}]$  across the islet is not well established, and has  
85 been a significant topic of debate [32, 33].

86 In this study we explore the theoretical basis for whether small  $\beta$ -cell subpopulations can control  
87 multicellular islet  $[Ca^{2+}]$  dynamics. Towards this, we utilize a computational model of the islet that we

88 have previously validated against a wide-range of experimental data [29, 34-36]. This includes  
89 understanding how populations of inexcitable cells suppress islet function and the role for electrical  
90 coupling. We investigate whether small populations of highly excitable cells or cells with high  
91 frequency oscillations can respectively drive the elevations or dynamics of islet  $[Ca^{2+}]$  oscillations.  
92 This includes simulating the removal of specific cell populations within the context of broad  
93 continuous distributions or distinct bimodal distributions of heterogeneity.

## 94 **Results**

95  
96 **How variation in metabolic activity impacts islet function.** Experimental evidence indicates that  
97 within the intact islet there exists 10-20% variation in metabolic activity [37]. Previous modelling  
98 studies have represented beta cell heterogeneity as a continuous distribution with 10-25% variation in  
99 GK activity and metabolic activity, which is sufficient to model the impact of electrical coupling and  
100 heterogeneity within the islet [29, 34-36]. However, recent experimental evidence has suggested that  
101 small  $\beta$ -cell subpopulations with elevated metabolic activity or GK expression are present within the  
102 islet and may disproportionately drive elevated  $[Ca^{2+}]$  [29, 30]. For example, ‘hub’  $\beta$ -cells show  
103 increased connectivity (synchronized  $Ca^{2+}$  oscillations) and increased GK expression compared to the  
104 rest of the islet [30]. When these ‘hub’ cells were hyperpolarized,  $[Ca^{2+}]$  is suppressed in large regions  
105 of the islet; whereas hyperpolarizing other cells had little impact.

106 We first asked whether identification of such a ‘hub’ subpopulations may arise as part of the  
107 natural variation within a continuous distribution. We simulated an islet with a continuous distribution  
108 in GK activity (Fig 1a), and targeted hyperpolarization to a population of cells based on their GK  
109 activity. Simulated islets had normal synchronized  $[Ca^{2+}]$  oscillations (Fig 1b), comparable to previous  
110 studies [29, 34-36, 38, 39]. When hyperpolarization was targeted to a random set of cells across the  
111 islet, near-normal  $[Ca^{2+}]$  activity was maintained until greater than 20% of cells within the islet were  
112 targeted (Fig 1b,c). Above this level, the islet lacked significant  $[Ca^{2+}]$  elevations (Fig 1c), consistent  
113 with prior measurements [34, 36]. When hyperpolarization was targeted specifically to cells with either  
114 higher GK ( $GK^{Higher}$ ) or lower GK ( $GK^{Lower}$ ), similar changes in  $[Ca^{2+}]$  activity were observed as with  
115 targeting a random subset of cells: the islet retained near-normal  $[Ca^{2+}]$  activity until greater than 20%  
116 of these  $GK^{Higher}$  or  $GK^{Lower}$  cells were targeted (Fig 1c). Nevertheless when 20% of cells were  
117 hyperpolarized, targeting  $GK^{Higher}$  cells did result in silencing of significantly more of the islet  
118 compared to  $GK^{Lower}$  cells. Within the simulated islet we also decoupled and removed the same  
119  $GK^{Higher}$  or  $GK^{Lower}$  populations. In this case, the remaining islet showed normal elevations in  $[Ca^{2+}]$ ,  
120 with little to no difference between removing  $GK^{Higher}$  or  $GK^{Lower}$  cells (Fig 1d).

121  
122 **Figure 1. Simulations predicting how variation in GK activity impact islet function.** A). Schematic of continuous  
123 distribution of heterogeneous GK activity across simulated islet with 25% variation in GK rate ( $k_{glc}$ ). B). Representative  
124 time courses of  $[Ca^{2+}]$  for 3 cells in simulated islet in A. Left is simulation with 0% hyperpolarized cells and right is  
125 simulation with a random 20% of cells hyperpolarized. Blue trace is cell with lowest GK rate ( $k_{glc}$ ), Green is cell with the  
126 average GK rate, yellow is cell with the highest GK rate. C). Fraction of cells showing elevated  $[Ca^{2+}]$  activity (active cells)  
127 in simulated islets vs. the percentage of cells hyperpolarized in islet. Hyperpolarized cells are chosen based on their GK  
128 rate. D). Fraction of active cells in islet when cells are uncoupled from the rest of the cells in the simulation. E). Histogram  
129 showing average frequency of cells at varying GK rate ( $k_{glc}$ ) for simulations that have different standard deviation in GK  
130 activity. F). Average duty cycle of cells from simulations with different standard variation in GK activity. G). As in C. for  
131 simulations with standard deviation in GK activity at 50% of the mean. H). As in D. for simulations with standard deviation

132 in GK activity at 50% of the mean. Error bars are mean  $\pm$  s.e.m. Repeated measures one-way ANOVA with Tukey post-  
133 hoc analysis was performed for simulations in C and G, Student's paired t-test was performed for D and H, and one-way  
134 ANOVA was performed for F to test for significance. Significance values: ns indicates not significant ( $p > .05$ ), \* indicates  
135 significant difference ( $p < .05$ ), \*\* indicates significant difference ( $p < .01$ ), \*\*\* indicates significant difference ( $p < .001$ ),  
136 \*\*\*\* indicates significant difference ( $p < .0001$ ). Data representative of 5 simulations with differing random number seeds.

137

138 Given uncertainty in the exact level of heterogeneity within the islet, we next tested whether  
139 changes to the variability in GK could lead to differences in  $[Ca^{2+}]$  upon targeting cells with higher GK  
140 ( $GK^{Higher}$ ) or lower GK ( $GK^{Lower}$ ) cells. We simulated islets with decreased variation in GK activity  
141 (1% variation) or increased variation in GK activity (50% variation) and compared  $[Ca^{2+}]$  with our  
142 previous simulations of 25% variation (Fig 1e and S1a Fig). The duty cycle of the simulated islets  
143 slightly decreased as the GK variation increased (Fig 1f), but  $[Ca^{2+}]$  oscillations remained across the  
144 islet that closely matched previous studies. Under 50% variation in GK, when hyperpolarization was  
145 targeted to a random set of cells across the islet, the islet retained near-normal  $[Ca^{2+}]$  activity until  
146 greater than 20% of the islet was targeted, as before. In contrast, when hyperpolarization was targeted  
147 specifically to cells with higher GK ( $GK^{Higher}$ ),  $[Ca^{2+}]$  was largely abolished for greater than 10% of  
148 cells being targeted (Fig 1g). However, when hyperpolarization was targeted to lower GK ( $GK^{Lower}$ )  
149 cells,  $[Ca^{2+}]$  was largely unchanged until 30% of cells were targeted (Fig 1g). As such, upon  
150 hyperpolarizing 20% of cells, a substantial difference in  $[Ca^{2+}]$  resulted from targeting  $GK^{Higher}$  or  
151  $GK^{Lower}$  cells. Nevertheless, when these higher GK or lower GK cells were decoupled and removed  
152 from the islet, the impact on  $[Ca^{2+}]$  elevations was very minor. A minor 2-4% decrease in  $[Ca^{2+}]$   
153 occurred when removing  $>10\%$   $GK^{Higher}$  cells, with no impact when removing  $GK^{Lower}$  cells (Fig 1h).

154 We also tested whether changing other properties of cells with higher GK or lower GK would  
155 impact the suppression of  $[Ca^{2+}]$ . When GK activity correlated with gap junction conductance such that  
156 higher GK cells also had increased gap junction conductance ( $GK^{Higher}/g_{Coup}^{Higher}$ ), little impact was  
157 observed (S2a-c Fig). However, when GK activity negatively correlated with  $K_{ATP}$  conductance, such  
158 that higher GK cells had increased gap junction conductance, but also had reduced  $K_{ATP}$  conductance,  
159 no difference occurred when hyperpolarizing higher GK ( $GK^{Higher}/g_{Coup}^{Higher}/g_{KATP}^{Lower}$ ) or lower GK  
160 ( $GK^{Lower}/g_{Coup}^{Lower}/g_{KATP}^{Higher}$ ) cells (S2d-f Fig).

161 Thus, hyperpolarizing a small sub-population of metabolically active cells can disproportionately  
162 suppress islet  $[Ca^{2+}]$ , particularly when heterogeneity is very broad. However, when these same cells  
163 are removed or absent from the islet, the impact on  $[Ca^{2+}]$  is minimal under the model assumptions set  
164 here.

165

166 **Impact of a bimodal distribution of functional  $\beta$ -cell subpopulations.** We next examined how  
167 imposing a bimodal distribution in GK activity would impact targeting hyperpolarization to a small  
168 population of metabolically active cells. We simulated an islet with a population of highly metabolic  
169 cells that comprised 10% of the islet ( $GK^{High}$ ) (Fig 2a). To maintain normal average GK activity, the  
170 rest of the islet had slightly reduced GK activity ( $GK^{Low}$ ) (Fig 2b). Gap junction coupling conductance  
171 of all cells remained unchanged (S1b Fig). Under this bimodal distribution, the islet displayed regular  
172  $[Ca^{2+}]$  oscillations at high glucose that closely matched previous simulations (Fig 2c). We tested the  
173 effect of targeting hyperpolarization to either the  $GK^{High}$  or  $GK^{Low}$  cell populations. When all  $GK^{High}$   
174 cells (10%) were hyperpolarized,  $[Ca^{2+}]$  was fully suppressed across the islet. Conversely, when  $GK^{Low}$

175 cells (10%) were hyperpolarized,  $[Ca^{2+}]$  remained largely unchanged (Fig 2d). However, when a  
176 greater proportion of  $GK^{Low}$  cells (20%) were hyperpolarized,  $[Ca^{2+}]$  was suppressed, as with a  
177 continuous distribution under 50% variation. These results show very good agreement between prior  
178 experiments where very different  $[Ca^{2+}]$  response was observed when hyperpolarizing cells with higher  
179 GK and cells with lower GK.

180

181 **Figure 2. Bimodal distribution in GK activity predicts small highly functional cells are dispensable for islet  $[Ca^{2+}]$**   
182 **dynamics.** A). Schematic of bimodal distribution of GK activity across simulated islet. B). Histogram showing average  
183 frequency of cells at varying GK rate ( $k_{glc}$ ) for bimodal compared with continuous distribution (25% St Dev). C).  
184 Representative time courses of  $[Ca^{2+}]$  for 3 cells in simulated bimodal islet in A. Blue traces are cells from  $GK^{Low}$   
185 population and orange traces are cells from  $GK^{High}$  population. D). Fraction of cells showing elevated  $[Ca^{2+}]$  activity (active  
186 cells) in bimodal simulations vs. the percentage of cells hyperpolarized in islet. Hyperpolarized cells are chosen either from  
187  $GK^{High}$  (orange bars) or  $GK^{Low}$  (blue bars) population. E). Schematic of simulation where only  $GK^{Low}$  cells are present and  
188 no  $GK^{High}$  cells are included. F). Representative time courses of  $[Ca^{2+}]$  for 3 cells in simulated islet in E. G). Average duty  
189 cycle of cells from simulations of a bimodal model as in A (With  $GK^{High}$ ) and from simulations as in E (Without  $GK^{High}$ ).  
190 Error bars are mean  $\pm$  s.e.m. Student's paired t-test was performed to test for significance. Significance values: ns indicates  
191 not significant ( $p>.05$ ), \* indicates significant difference ( $p<.05$ ), \*\* indicates significant difference ( $p<.01$ ), \*\*\* indicates  
192 significant difference ( $p<.001$ ), \*\*\*\* indicates significant difference ( $p<.0001$ ). Data representative of 4 simulations with  
193 differing random number seeds.

194

195 We next tested whether the cells from the highly metabolic population ( $GK^{High}$ ) are important to  
196 support islet function, by simulating an islet with only cells from the lower GK population ( $GK^{Low}$ )  
197 (Fig 2e). In this context, the islet retained near-normal  $[Ca^{2+}]$  activity (Fig 2f), with a minor drop in  
198 duty cycle (Fig 2g). As such, the simulated islet was capable of functioning near-normally in the  
199 absence of a small (~10%) highly metabolic subpopulation. Thus, despite showing substantial  
200 differences in islet activity when hyperpolarized, a small metabolically active subpopulation is not  
201 required to maintain elevations in oscillatory  $[Ca^{2+}]$  across the islet.

202

203 **How variations in gap junction coupling impact functional  $\beta$ -cell subpopulations.** Metabolically  
204 active subpopulations of cells that disproportionately control the islet have been suggested to have  
205 increased connectivity [30]. We next examined how changes in gap junction electrical coupling affect  
206 how targeting hyperpolarization to specific cell populations impacts islet  $[Ca^{2+}]$ . We simulated the islet  
207 with the same bimodal distribution in GK activity as in Fig 2, but correlated gap junction coupling  
208 conductance ( $g_{Coup}$ ) with GK activity ( $k_{glc}$ ) across the islet (Fig 3a and S1c Fig). As such, more  
209 metabolically active  $GK^{High}$  cells had ~2 times higher coupling conductance than that of the population  
210 of cells with lower metabolic activity ( $GK^{Low}$  cells). Under this model, when the highly metabolic  
211 population,  $GK^{High}$  cells, were targeted with hyperpolarization, the islet retained some  $[Ca^{2+}]$  elevations  
212 (~45%) (Fig 3b). When cells with less metabolic activity,  $GK^{Low}$ , cells were targeted with  
213 hyperpolarization, the islet showed little change in  $[Ca^{2+}]$  activity, as before. As such, the suppression  
214 of  $[Ca^{2+}]$  upon targeting hyperpolarization to highly metabolic cells is reduced by those cells having  
215 elevated electrical coupling, (Fig 3c). We further simulated the islet with a bimodal distribution in both  
216 GK activity and gap junction conductance, such that more metabolically active  $GK^{High}$  cells had  
217 increased their coupling conductance by ~3 times (Fig 3d and S1d Fig). Under these conditions when  
218 highly metabolic cells were targeted with hyperpolarization, the islet retained substantial  $[Ca^{2+}]$

219 elevations (~60%) (Fig 3e,f). Thus, increasing gap junction coupling does not enhance the ability of  
220 metabolically active cells to maintain oscillatory islet  $[Ca^{2+}]$  elevations.

221

222 **Figure 3. Simulations predicting how changes in coupling impact highly metabolic populations in a bimodal model.**

223 A). Scatterplot of  $g_{Coup}$  vs.  $k_{glc}$  for each cell from a representative simulation where  $g_{Coup}$  is correlated with  $k_{glc}$ . B). Fraction  
224 of cells showing elevated  $[Ca^{2+}]$  activity (active cells) vs. the percentage of cells hyperpolarized in islet from bimodal  
225 simulations in  $k_{glc}$  with correlated  $g_{Coup}$  and  $k_{glc}$  as in A. Hyperpolarized cells are chosen either from  $GK^{High}$  (orange bars) or  
226  $GK^{Low}$  (blue bars) population. C). As in B. but comparing hyperpolarization in  $GK^{High}$  cells in the presence and absence of  
227 correlations in  $g_{Coup}$ . D). as in A but from a simulation where  $g_{Coup}$  and  $k_{glc}$  are correlated AND both  $g_{Coup}$  and  $k_{glc}$  are  
228 bimodal distributions. E). As in B. but for simulations where  $g_{Coup}$  and  $k_{glc}$  are correlated AND both  $g_{Coup}$  and  $k_{glc}$  are  
229 bimodal distributions. F). As in C. but comparing hyperpolarization in  $GK^{High}$  cells in the presence and absence of a  
230 bimodal distribution of  $g_{Coup}$ . Error bars are mean  $\pm$  s.e.m. Student's paired t-test was performed for B and E and a Welch's  
231 t-test for unequal variances was used for C and F to test for significance. Significance values: ns indicates not significant  
232 ( $p > .05$ ), \* indicates significant difference ( $p < .05$ ), \*\* indicates significant difference ( $p < .01$ ), \*\*\* indicates significant  
233 difference ( $p < .001$ ), \*\*\*\* indicates significant difference ( $p < .0001$ ). Data representative of 4 simulations with differing  
234 random number seeds.

235

236 Given this dependence on gap junction coupling, we examined whether decreases in coupling  
237 impacted how metabolically active cells controlled islet function. We performed similar simulations as  
238 in Fig 1 and Fig 2 for an islet with reduced average gap junction conductance of 50%. In this context,  
239 hyperpolarizing highly metabolic populations ( $GK^{Higher}$  or  $GK^{High}$ ) or cells with reduced metabolic  
240 activity ( $GK^{Lower}$  or  $GK^{Low}$ ) reduced islet  $[Ca^{2+}]$  to a lesser degree than when gap junction conductance  
241 was higher (S3 Fig). This applied to simulated islets with either a continuous distribution in GK  
242 activity (S3a,b Fig) or a bimodal distribution of GK activity (S3c,d Fig). In each case, a similar  
243 difference in islet  $[Ca^{2+}]$  resulted from hyperpolarizing highly metabolic or low metabolic cells, albeit  
244 with greater numbers of cells needing targeting to suppress  $[Ca^{2+}]$ . Thus, decreasing gap junction  
245 coupling does not enhance the ability of small populations of metabolic active cells to maintain islet  
246  $[Ca^{2+}]$ .

247

248 **Cells with  $[Ca^{2+}]$  oscillations that precede the rest of the islet do not drive islet  $[Ca^{2+}]$  oscillations.**

249 Another subpopulation of  $\beta$ -cells that has been associated with islet function are those cells that show  
250  $[Ca^{2+}]$  oscillations that precede the rest of the islet [29, 31, 40]. These cells have been suggested to  
251 have higher intrinsic oscillation frequency [29, 40], which may lend themselves to act as rhythmic  
252 pacemakers to drive  $[Ca^{2+}]$  oscillations across the islet. We next investigated whether a small  
253 subpopulation of these cells is able to drive islet  $[Ca^{2+}]$  oscillatory dynamics. We simulated an islet  
254 with a continuous distribution of heterogeneity, as in Fig 1, and identified cells with  $[Ca^{2+}]$  oscillations  
255 that preceded the rest of the islet (low phase) or cells with  $[Ca^{2+}]$  oscillations that are delayed with  
256 respect to the rest of the islet (high phase) (Fig 4a,b). Cells that preceded the rest of the islet (low phase  
257 cells) were temporally separated to a greater degree with respect to the rest of the islet compared to  
258 cells that were delayed (high phase cells) (Fig 4c). The top 1% and 10% of low phase cells (earlier  
259  $[Ca^{2+}]$  oscillations) in the islet had higher intrinsic oscillation frequency – the oscillation frequency if  
260 the cell is simulated in isolation – and lower GK activity compared to the rest of the islet (Fig 4d,e).  
261 This is consistent with prior experimental measurements that demonstrated lower metabolic activity in  
262 cells that show earlier  $[Ca^{2+}]$  oscillations [29]. Conversely, the top 1% and 10% of high phase = cells  
263 (delayed  $[Ca^{2+}]$  oscillations) had lower intrinsic oscillation frequency and high GK activity (Fig 4d,e).



264  
265  
266  
267  
268  
269  
270  
271  
272  
273  
274  
275  
276  
277  
278  
279  
280  
281  
282  
283

**Figure 4. Simulations predicting how small populations of cells contribute to islet frequency.** A). Schematic of phase lag across simulated islet with 25% variation in GK activity. B). Representative time courses of  $[Ca^{2+}]$  for 9 cells in simulated islet at 60pS coupling conductance to determine phase lag of cells in A. Blue traces are low phase cells (negative phase lag), Grey is non low or high phase cells, red is a high phase cells (positive phase lag). Inset: Close up of rise of  $[Ca^{2+}]$  oscillation showing phase lags. C). Phase lag from islet average of top 1% or 10% of low phase, high phase cells, or random cells. D). Average  $k_{glc}$  from all cells, low phase cells or high phase cells across simulated islet. E). Average intrinsic oscillation frequencies of all cells, top 1% and 10% of low phase cells, or top 1% or 10% of high phase cells when re-simulated in the absence of gap junction coupling (0pS). F). Average frequency of islet when indicated populations of cells are removed from the simulated islet. G). Change in frequency of islet with indicated populations removed with respect to control islet with all cells present. H). Change in frequency when low phase cells are removed compared to average oscillation frequency of remaining cells that indicates the expected oscillation frequency. I). Same as H. but for simulations where high phase cells are removed. Error bars are mean  $\pm$  s.e.m. Repeated measures one-way ANOVA with Tukey post-hoc analysis was performed for simulations in C-G (if there were any missing values a mixed effects model was used), Student's paired t-test was performed for H and I to test for significance. Significance values: ns indicates not significant ( $p > .05$ ), \* indicates significant difference ( $p < .05$ ), \*\* indicates significant difference ( $p < .01$ ), \*\*\* indicates significant difference ( $p < .001$ ), \*\*\*\* indicates significant difference ( $p < .0001$ ). Data representative of 4-9 simulations with differing random number seeds. Random regions were removed for 10% and 30% simulations, but random removal of cells was used for 1% simulations.

284 To determine the role these cells may play in islet function, we re-simulated the islet with  
285 populations of low phase and high phase cells removed from the islet. When populations (1%, 10%,  
286 30%) of low or high phase cells were removed, the elevation of  $[Ca^{2+}]$  was unchanged (S4a Fig).  
287 Similarly, the frequency of the islet did not differ significantly from control islets when up to 10% of  
288 low or high phase cells were removed (Fig 4f,g). Low or high phase cells usually exist within a  
289 compact region, rather than being distributed randomly across the islet. Removing random cells within  
290 a similar sized region impacts frequency of the remaining islet to a lesser degree than removing  
291 randomly positioned cells across the islet (S5 Fig). Removal of up to 10% of low phase or high phase  
292 cells also showed no change in frequency compared to removal of random cells within a similar sized  
293 region (Fig 4f, g). When 30% of low phase cells (earlier  $[Ca^{2+}]$  oscillations) were removed from the  
294 islet, frequency decreased slightly, by ~2% (Fig 4g). This minor decrease in frequency was equivalent  
295 to the average frequency of the remaining cells in the islet, indicating no disproportionate effect of the  
296 low phase cells on oscillation frequency (Fig 4h). In contrast, when 30% of high phase cells (delayed  
297  $[Ca^{2+}]$  oscillations) were removed, the islet frequency increased, by ~8% (Fig 4g). This increase in  
298 frequency upon removing the phase high cells was significantly greater than the average frequency of  
299 the remaining cells in the islet, indicating a disproportionate effect of high phase (delayed) cells on  
300 oscillation frequency (Fig 4i). When these manipulations were performed in the presence of reduced  
301 (50%) gap junction conductance, the changes in frequency were exacerbated: no change in frequency  
302 when removing low phase (early) cells and a greater increase in frequency (~15%) when removing  
303 high phase (delayed) cells (S6 Fig). Thus, low phase cells that show earlier  $[Ca^{2+}]$  oscillations do not  
304 drive the  $[Ca^{2+}]$  oscillation frequency of the islet, when considering a continuous distribution of cell  
305 heterogeneity. However, unexpectedly, high phase cells that show delayed  $[Ca^{2+}]$  oscillations appear to  
306 drive a slower  $[Ca^{2+}]$  oscillation frequency; but only in proportions of at least 30% of the islet.

307 Low phase and high phase cells that show different timings in their  $[Ca^{2+}]$  oscillations on average  
308 have higher or lower intrinsic  $[Ca^{2+}]$  oscillation frequency respectively. However, other factors such as

309 gap junction coupling or position within the cluster may also determine their relative timing. We next  
310 examined the role of cells that intrinsically have the highest or lowest  $[Ca^{2+}]$  oscillation frequency (Fig  
311 5a-c). The top 1% or 10% of cells with highest or lowest intrinsic oscillation frequency, showed a  
312 frequency substantially different than the islet average (Fig 5d). On average, cells with a higher  
313 intrinsic oscillation frequency showed earlier  $[Ca^{2+}]$  oscillations compared with the average of the islet  
314 (Fig 5e) and had lower metabolic activity (Fig 5f). In contrast, cells with the lowest frequency showed  
315 delayed  $[Ca^{2+}]$  oscillations compared with the average of the islet and had higher metabolic activity  
316 (Fig 5e,f). This is consistent with previous experimental measurements that demonstrated a negative  
317 correlation between oscillation frequency and metabolic activity [29]. We do note that a small (~0.5%)  
318 of cells with low metabolic activity lacked  $[Ca^{2+}]$  elevations and were excluded from frequency  
319 measurements.

320  
321 **Figure 5. Simulations predicting how intrinsic frequency of cells contributes to islet frequency.** A). Schematic of  
322 frequency across simulated islet with 25% variation in GK activity. B). Representative time courses of  $[Ca^{2+}]$  for 9 cells in  
323 simulated islet in A in a simulation with full (120pS) coupling conductance. Blue traces are high frequency cells, Grey are  
324 cells with frequency near average frequency, red traces are low frequency cells. C). Same cells as in B but showing  $[Ca^{2+}]$   
325 time courses from an uncoupled simulation (0pS coupling conductance). D). Average intrinsic oscillation frequencies of all  
326 cells, top 1% or 10% of high frequency cells, or low frequency cells when re-simulated in the absence of gap junction  
327 coupling. E). Phase lag from islet average of top 1% or 10% of low phase, high phase cells, or random cells. F). Average  
328  $k_{glc}$  from all cells, high frequency cells, or low frequency cells across simulated islet. G). Average frequency of islet when  
329 indicated populations of cells are removed from the simulated islet. H). Change in frequency of islet with indicated  
330 populations removed with respect to control islet with all cells present. I). Change in frequency when high frequency cells  
331 are removed compared to average oscillation frequency of remaining cells that indicates the expected oscillation frequency.  
332 J). Same as I. but for simulations where low frequency cells are removed. Error bars are mean  $\pm$  s.e.m. Repeated measures  
333 one-way ANOVA with Tukey post-hoc analysis was performed for simulations in D-H and a Student's paired t-test was  
334 performed for I and J to test for significance. Significance values: ns indicates not significant ( $p > .05$ ), \* indicates  
335 significant difference ( $p < .05$ ), \*\* indicates significant difference ( $p < .01$ ), \*\*\* indicates significant difference ( $p < .001$ ),  
336 \*\*\*\* indicates significant difference ( $p < .0001$ ). Data representative of 5 simulations with differing random number seeds.  
337 Random removal of cells across the islet was used for all simulations where random cells removed is indicated.

338  
339 When greater than 10% or 30% of high frequency cells were removed from the islet, the frequency  
340 of the islet decreased, whereas when 10% or 30% of lower frequency cells were removed from the  
341 islet, the frequency of the islet increased (Fig 5g,h). However, in each case the change in frequency  
342 upon removing high or low frequency cells was not significantly greater than the change when  
343 considering the average frequency of the remaining cells (Fig 5i,j). In fact, the decrease in frequency  
344 upon removing high frequency cells was significantly less than that considering the frequency of  
345 remaining cells (Fig 5i). In each case, the elevation of  $[Ca^{2+}]$  was unchanged (S4b Fig). These results  
346 again suggest that small numbers of cells with differing oscillation frequency do not disproportionately  
347 affect islet  $[Ca^{2+}]$  oscillations.

348  
349 **A bimodal distribution in frequency lessens the effect of high phase cells.** Earlier we considered a  
350 bimodal distribution in metabolic activity that better described experimental data (Fig 2)[30]. We next  
351 investigated whether high phase and low phase cells may influence the islet to a greater degree when  
352 described by a bimodal distribution. From the continuous distribution we previously modelled (Fig 4),  
353 we generated a population of cells that incorporated the average properties of low phase cells that

354 showed earlier oscillations in  $[Ca^{2+}]$  (see methods). This population (10%), which showed a faster  
355 oscillation frequency (Fig 6a and S7a Fig) was combined with a population of cells that were similar to  
356 the average properties of an islet. The resultant simulated islet showed cells with earlier and delayed  
357  $[Ca^{2+}]$  oscillations, as before (Fig 6b,c), albeit with a slight reduction in the time between the early and  
358 delayed oscillations (Fig 6d). On average, the low phase cells that showed earlier  $[Ca^{2+}]$  oscillations  
359 had higher intrinsic oscillation frequencies (Fig 6e) and lower metabolic activity (Fig 6f), as before.  
360 However, the difference between low and high phase cells was not a large as with the continuous  
361 distribution. When low phase cells or high phase cells were removed from the islet, the frequency was  
362 not significantly different than when random cells were removed (Fig 6g). However, when 10% of low  
363 phase cells were removed, the change in frequency was significantly different, albeit small, compared  
364 to the expected frequency of the remaining cells in the distribution (Fig 6h). On the other hand, the  
365 removal of high phase cells was not significantly different than the expected frequency of the  
366 remaining cells (Fig 6i).

367  
368 **Figure 6. Simulations predicting how cells from a bimodal distribution characterized by low phase cells contribute**  
369 **to islet frequency.** A). Schematic of frequency across simulated islet with a bimodal distribution in GK activity. B).  
370 Schematic of phase lag across simulated islet with a bimodal distribution in GK activity. C). Representative time courses of  
371  $[Ca^{2+}]$  for 6 cells in simulated islet in A (and B) in a simulation with full (120pS) coupling conductance. Blue traces are  
372 high frequency cells, red traces are low frequency cells. Inset: Close up of rise of  $[Ca^{2+}]$  oscillation showing phase lags.  
373 D). Phase lag from islet average of top 1% or 10% of low phase, high phase cells, or random cells. E). Average intrinsic  
374 oscillation frequencies of all cells and 1% or 10% of low phase cells, or 1% or 10% of high phase cells when re-simulated  
375 in the absence of gap junction coupling (0pS). F). Average  $k_{glc}$  from all cells and top 1% or 10% of low phase cells or high  
376 phase cells across simulated islet. G). Change in frequency of islet with indicated populations removed with respect to  
377 control islet with all cells present. H). Change in frequency when low phase cells are removed compared to average  
378 oscillation frequency of remaining cells that indicates the expected oscillation frequency. I). Same as H. but for simulations  
379 where high phase cells are removed. Repeated measures one-way ANOVA with Tukey post-hoc analysis was performed for  
380 simulations in D-G and a Student's paired t-test was performed for H and I to test for significance. Error bars are mean  $\pm$   
381 s.e.m. Significance values: ns indicates not significant ( $p>.05$ ), \* indicates significant difference ( $p<.05$ ), \*\* indicates  
382 significant difference ( $p<.01$ ), \*\*\* indicates significant difference ( $p<.001$ ), \*\*\*\* indicates significant difference  
383 ( $p<.0001$ ). Data representative of 5 simulations with differing random number seeds. Random removal of cells across the  
384 islet was used where random cells removed is indicated.

385  
386 We further examined how the islet behaved when the high frequency population of cells were  
387 removed. These high frequency cells showed only slightly earlier  $[Ca^{2+}]$  oscillations compared to the  
388 rest of the islet on average (S7b Fig) but did show lower metabolic activity (S7c Fig). Upon removal of  
389 these high frequency cells, the islet showed significantly slower oscillations (S7d Fig), that were  
390 slower than expected given the average frequency of the remaining cells (S7d,e Fig). However, the  
391 change in frequency was still low (~2%). When these high frequency cells were positioned with the  
392 same spatial distribution as low phase cells, the change in frequency upon their removal was  
393 significantly greater but was still relatively small and similar to the change seen when high frequency  
394 cells were removed from the continuous distribution model (~5%) (S8 Fig). In conclusion, within a  
395 bimodal distribution, a small population of cells with higher frequencies does not substantially impact  
396 the frequency of the islet.  
397

398 **Limited excitatory gap junction current can explain lack of action of small sub-populations.** To  
399 understand the basis by which cells with differing metabolic activity and oscillatory frequency interact,  
400 we examined the gap junction currents for cell populations within the islet (Fig 7a). As expected, the  
401 total membrane current was highest in magnitude during the upstroke and downstroke of the  $[Ca^{2+}]$   
402 oscillation, and low in magnitude during the active and silent phase (Fig 7b-d). Conversely, the gap  
403 junction current was highest during the active and silent phase of the  $[Ca^{2+}]$  oscillation but was  
404 minimal during the upstroke and downstroke of  $[Ca^{2+}]$  (Fig 7b-c,e). Thus, there is less communication  
405 between cells during the upstroke and downstroke of  $[Ca^{2+}]$  oscillations compared to the stable active  
406 and silent phases.

407  
408 **Figure 7. Gap junction current in cells with high/low metabolic activity or oscillation frequency.** A). Schematic of cell  
409 within the simulated islet, showing 3 gap junction currents that contribute to the total gap junction current, together with the  
410 total membrane current. B). Time course of  $[Ca^{2+}]$  from a cell, together with the total membrane current and total gap  
411 junction current for a representative cell with higher metabolic activity ( $k_{glc}$ ). C). As in B for a representative cell with  
412 lower metabolic activity. D). Total membrane current, as expressed by an area under the curve (AUC), for each phase of the  
413  $[Ca^{2+}]$  oscillation averaged over the 10% of cells with highest or lowest  $k_{glc}$  or a random 10% of cells. E). As in D for total  
414 gap junction current. F). Distribution of total gap junction current, as expressed by AUC, for the 10% of cells with highest  
415 or lowest  $k_{glc}$  or a random 10% of cells. G). As in E for a bimodal distribution in  $k_{glc}$ . H). Mean duration of active phase and  
416 silent phase averaged over the 10% of cells with highest or lowest oscillation frequency, or a random 10% of cells. I). Mean  
417 islet  $[Ca^{2+}]$  time course showing different portions of the active phase (1-4). J). Mean islet gap junction current during  
418 different portions of the active phase, as indicated in I for the 10% of cells with highest or lowest oscillation frequency, or a  
419 random 10% of cells. Black lines are fitted regression lines. Error bars are mean  $\pm$  s.e.m. Repeated measures one-way  
420 ANOVA was performed for data in D, E, H to test for significance. Linear regression was performed on data in J.  
421 Significance values: ns indicates not significant ( $p > .05$ ), \* indicates significant difference ( $p < .05$ ), \*\* indicates significant  
422 difference ( $p < .01$ ), \*\*\* indicates significant difference ( $p < .001$ ), \*\*\*\* indicates significant difference ( $p < .0001$ ), †  
423 indicates significant linear regression ( $p < .05$ ), ‡ indicated significant linear regression ( $p < .01$ ). Data representative of 5  
424 simulations with differing random number seeds.

425  
426 The total membrane current did not differ significantly between cells with high or low metabolic  
427 activity (Fig 7d). However, there was a substantial difference in gap junction current between cells  
428 with high or low metabolic activity (Fig 7e). Cells with high metabolic activity showed a positive  
429 (outward, hyperpolarizing) gap junction current, whereas cells with low metabolic activity showed a  
430 negative (inward, depolarizing) gap junction current, across all phases of the  $[Ca^{2+}]$  oscillation (Fig  
431 7e). The magnitude of the gap junction current for less metabolically active cells was also greater. This  
432 larger gap junction-mediated current would be expected to hyperpolarize neighboring cells to a greater  
433 degree than metabolically active cells depolarizing neighboring cells. Nevertheless, there was  
434 significant variability, such that some cells with low metabolic activity had little gap junction current  
435 and some cells with high metabolic activity had a positive current that would depolarize neighbors (Fig  
436 7f). When examining the bimodal simulation (Fig 2), we observed broadly similar findings where cells  
437 with high metabolic activity depolarize their neighbors whereas cells with low metabolic activity  
438 hyperpolarize their neighbors (Fig 7g).

439 Finally, given the stronger gap junction current associated with the active and silent phases, we  
440 analyzed the relationship between the duration of these phases for cells with high and low frequency.  
441 Cells with a higher intrinsic oscillation frequency showed both a shorter active phase and shorter silent  
442 phase compared to cells with a slower intrinsic oscillation frequency, with there being a greater

443 difference in the active phase (Fig 7h). Interestingly, the whole islet active and silent phase times were  
444 similar to those of cells with a higher oscillation frequency (which on average have lower metabolic  
445 activity). During the active phase, the gap junction current was lowest at the beginning of the active  
446 phase and greatest just before the downstroke (Fig 7i,j). We measured changes to the duration of the  
447 active and silent phases after removal of low/high phase cells and low/high frequency cells from Fig 4  
448 and 5. When either high phase cells or low frequency cells were removed, the active phase and duty  
449 cycle duration decreased compared to when either low phase cells or high frequency cells were  
450 removed, respectively (S9 Fig). Thus gap junction coupling contributes more to sustaining the active  
451 phase compared to initiating the active phase. While slower oscillating cells contribute significantly to  
452 setting the islet frequency, given the greater gap junction current, faster oscillating cells may limit the  
453 duration of the active phase by terminating the oscillation.  
454

## 455 Discussion

456

457  $\beta$ -cell heterogeneity has largely been studied in single cells. However, recent studies have  
458 demonstrated that heterogeneity plays a physiological role in regulating insulin release within the islet  
459 [29, 30, 35]. Previously, using computational models and experimental systems, we demonstrated that  
460 a large minority (close to 50%) of metabolically active  $\beta$ -cells were necessary to maintain the activity  
461 of the islet [35]. In contrast to this, experimental and theoretical studies have suggested that small  
462 (~10%) highly functional subpopulations may be required to maintain whole islet electrical dynamics  
463 [30, 41]. Here, we investigated the theoretical basis by which small populations of cells may impact  
464 islet electrical dynamics.

465

466 **Small populations of metabolically active cells are not required to drive elevations in  $[Ca^{2+}]$ .** To  
467 determine whether small populations of metabolically active  $\beta$ -cells could drive elevations in  $[Ca^{2+}]$ ,  
468 we constructed two types of islet simulations: showing either a continuous distribution in metabolic  
469 activity or a bimodal distribution in metabolic activity. In each case, we either hyperpolarized the most  
470 metabolically active cells or removed them from the simulation. These manipulations are equivalent to  
471 those applied in the literature. For example, one study used optical stimulation of eNpHr3.0 to induce a  
472 hyperpolarizing  $Cl^-$  current in 1-10% of cells that showed high levels of  $[Ca^{2+}]$  coordination and  
473 elevated GK [30]. Another study used optical stimulation of ChR2 to induce a depolarizing cation  
474 current, with the ~10% of cells activating large parts of the islet showing higher NAD(P)H [29]. In our  
475 simulations, we found hyperpolarizing those cells with increased metabolic activity generated similar  
476 findings: hyperpolarizing more metabolically active cells silenced the islet to a much greater degree  
477 than hyperpolarizing less metabolically active cells. Thus, hyperpolarization or depolarization of  
478 metabolically active  $\beta$ -cells can disproportionately suppress or activate islet function, via gap junction  
479 coupling.

480 Importantly, the effects of this targeted silencing were found for both a broad continuous  
481 distribution (Fig 1) and for a bimodal distribution (Fig 2). Within the literature there is not exact  
482 consistency in the level of metabolic heterogeneity present. Within dissociated  $\beta$ -cells, a variation of  
483 20-30% in NAD(P)H responses has been observed experimentally [19, 37], and in intact islets a  
484 variation of 10-20% has been observed [37]. Instead, ~50% variation is needed to describe  
485 experimental observations here. However, early analysis of GK heterogeneity via  
486 immunohistochemistry observed substantial variations, which while not quantified would be  
487 equivalent to >50% [17]. Similarly, in isolated  $\beta$ -cells the glucose threshold for elevated NAD(P)H  
488 varies by ~50% (3-10mM) [16, 42]. This latter study also found a non-normal distribution with ~20%  
489 of highly metabolically active  $\beta$ -cells. Thus, the distributions required in our model to generate results  
490 equivalent to experimental observations are broadly feasible. Furthermore, we do note the process of  
491 removing  $\beta$ -cells from the islet via dissociation causes cell stress and could disrupt metabolic  
492 signatures. Highly metabolically active cells may also be more susceptible to environmental stress [30,  
493 43]. Therefore, further analysis, in situ, is needed to precisely quantify the level of heterogeneity  
494 present.

495 Interestingly, we observed very different results when comparing the effect of targeted  
496 hyperpolarization of a set of cells and targeted removal of a set of cells. Hyperpolarizing a small

497 population of metabolically active cells silenced the islet, whereas removal of this same cell population  
498 had little impact. Upon removal, we did observe a small reduction in the duty cycle (% of time the islet  
499 resides in the active phase) of ~10%. Duty cycle is a large determinant of insulin release, thus a ~10%  
500 reduction would not be expected to impact insulin release substantially. However, experimental  
501 measurements would be needed to exclude whether exocytosis varies across the pulse duration. As  
502 such, the manipulations involving hyperpolarization and cell removal, theoretically, assess the  
503 importance a cell has on islet function in different ways. Thus, care must be taken when interpreting  
504 the results of optogenetic stimulation-based analysis.

505 Cell removal from the simulation may be considered similar to the experimental ablation of that  
506 cell. Ablation of small populations of cells that show earlier  $[Ca^{2+}]$  oscillations (see below), but which  
507 overlaps with those cells that show increased  $[Ca^{2+}]$  coordination, has experimentally been  
508 demonstrated to reduce the elevation in  $[Ca^{2+}]$  across zebrafish islets. These studies showed a  
509 substantial reduction in  $[Ca^{2+}]$  amplitude, whereas our theoretical findings showed no apparent  
510 differences in amount of active cells. Little change in  $[Ca^{2+}]$  activity is observed in the model when  
511 removing either those cells with earlier  $Ca^{2+}$  oscillations (S4 Fig) or those cells with elevated metabolic  
512 activity that when hyperpolarized silences islet  $[Ca^{2+}]$  (Fig 1,2). However, differences do exist between  
513 zebrafish islets and mouse islets which our model is based upon and has been validated against,  
514 including islet size, gap junction protein isoform and  $Ca^{2+}$  dynamics [44, 45]. Thus, species differences  
515 may account for these observations.

516 The way cells interact within our simulated islet is restricted to gap junction electrical coupling. As  
517 such, we conclude that gap junction communication is unlikely to be able to explain the role small cell  
518 subpopulations play in islet function, under the model assumptions presented here. These conclusions  
519 are also consistent with elevated oscillatory  $[Ca^{2+}]$  being maintained upon a loss of Cx36 gap junction  
520 coupling [15], albeit with a lack of synchronization. However, we do note that first phase insulin  
521 release is diminished upon a loss of Cx36 gap junction coupling [46]. Therefore, we cannot exclude  
522 that small cell subpopulations can drive  $[Ca^{2+}]$  elevations via gap junction coupling during the initial  
523 first phase response.

524  $\beta$ -cells can communicate across the islet via paracrine communication. This includes inhibitory  
525 factors such as GABA, 5-HT, dopamine and Ucn3 (via  $\delta$ -cell somatostatin release) and stimulatory  
526 factors such as ATP [47-49]. Thus, it is conceivable, small sub-populations of metabolic active cells  
527 are secreting increased levels of stimulatory paracrine factors. Alternatively, small sub-populations  
528 may be acting via other endocrine cells, such as glucagon-secreting  $\alpha$ -cells, to stimulate other  $\beta$ -cells  
529 within the islet [50]. Removal of immature cell populations can also disrupt islet function, suggesting a  
530 broader remodeling of the islet can be induced by small cell sub-populations [51]. Therefore, analyzing  
531 whether subpopulations show differential release of paracrine factors will be important to better  
532 elucidate their function within the islet.

533  
534 **Gap junction coupling homogenizes subpopulations and reduces their impact.** Gap junction  
535 coupling allows for heterogeneous populations of  $\beta$ -cells to act in a cohesive manner. For example,  
536 when populations of normally excitable and inexcitable cells combine within an islet, gap junction  
537 coupling ensures that a uniform response occurs, whether this be suppressed  $[Ca^{2+}]$  or coordinated  
538 elevated  $[Ca^{2+}]$  [34]. Some cell populations have been suggested to have elevated connectivity with

539 other cells in the islet, as measured by correlated  $[Ca^{2+}]$  oscillations [30, 31], and could result from an  
540 increase in gap junction coupling.

541 When more metabolically active cells had increased coupling conductance, hyperpolarizing those  
542 cells had less impact on suppressing islet function (Fig 3). If gap junction coupling is elevated in  
543 metabolically active cells, it is reduced in less metabolically active cells. A decrease in coupling lessens  
544 how the islet is suppressed in the presence of inexcitable cells that transmit hyperpolarizing current  
545 across the islet. Thus, hyperpolarizing a population of metabolically active cells would transmit less  
546 hyperpolarizing current beyond the nearest neighbor cells.

547 We also observed that less metabolically active cells show a greater gap junction current that hyper-  
548 polarizes neighboring cells. Thus, there is an asymmetry by which metabolically active and inactive  
549 cells within the islet act (Fig 7). As such, increases in coupling are not beneficial for highly metabolic  
550 cells to control the islet. Rather distributing the coupling more uniformly allows all cells within the islet  
551 to coordinate their activity.

552  
553 **Small subpopulations cannot efficiently act as rhythmic pacemakers.** Multiple studies have  
554 identified cells that consistently show earlier  $[Ca^{2+}]$  oscillations that may drive the dynamics of  $[Ca^{2+}]$   
555 across the islet [29, 31, 40]. These populations have been suggested to have a higher intrinsic  
556 oscillation frequency and thus act as a rhythmic pacemaker [29], in the same manner as the cardiac SA  
557 node. Here, we investigated whether a small subpopulation of cells with increased oscillation frequency  
558 could act as such a pacemaker. We found that cells that show earlier  $[Ca^{2+}]$  oscillations do have a  
559 higher intrinsic oscillation frequency. However, upon removal of these cells, the islet  $[Ca^{2+}]$  oscillations  
560 changed little, suggesting that small populations of these cells are unable to pace islet  $[Ca^{2+}]$   
561 oscillations. This initially is surprising as with all cells capable of firing, the cell with the highest  
562 frequency will depolarize first and stimulate neighbors to fire. However, at least ~30% of high  
563 frequency cells are required to even slightly impact islet oscillation frequency. These findings are  
564 consistent with prior modelling studies where cells with fast and slow oscillation frequencies, when  
565 combined within an islet, led to an overall oscillation midway between the intrinsic cell oscillations  
566 [52]. This suggests the oscillation frequency is not per se determined by a small pacemaker population  
567 but rather is formed by a weighted combination of all cells across the islet. Thus, the islet also shows  
568 significant redundancy where only loss of large populations of cells impacts the activity or dynamics of  
569  $[Ca^{2+}]$  (Fig 8). Further, the introduction of a small population (~10% cells) with a defined high intrinsic  
570 oscillation frequency has little impact on islet  $[Ca^{2+}]$  oscillations frequency and wave propagation.

571  
572 **Figure 8. Schematic of multicellular dynamics of the islet** A). Schematic of suggestion that small subpopulations of  
573 highly functional cells can control whole islet dynamics. White circles represent  $\beta$ -cells. Red arrows represent which cells  
574 can be controlled by individual cell where the arrow begins. Increasing functionality in cells is from right to left B). Same  
575 as A, but a schematic of how our simulations predict islet  $[Ca^{2+}]$  dynamics are controlled. Our simulations predict that  
576 control is redundant, and many cells can control many other cells. Our simulations predict there is not one small  
577 subpopulation that controls the entire islet. C). Same as B, but schematic of how our simulations predict the islet responds  
578 when highly functional subpopulations are removed. When highly functional subpopulations are removed, the remaining  
579 cells are able to maintain the function of the islet due to the redundancy in control.

580  
581 In contrast to removal of cells that show earlier  $[Ca^{2+}]$  oscillations, removal of those cells that show  
582 delayed  $[Ca^{2+}]$  oscillations increased the frequency of islet  $[Ca^{2+}]$  oscillations (Fig 4). These cells on



583 average showed slower oscillations. Therefore, slow  $[Ca^{2+}]$  oscillations contribute to setting the islet  
584  $[Ca^{2+}]$  oscillation frequency to a greater degree. This also suggests that slow metabolic oscillations will  
585 better coordinate  $[Ca^{2+}]$  dynamics across the islet, rather than purely a faster-oscillating electrical  
586 subsystem. Nevertheless, at least 30% of these slow oscillators are needed to have a substantial impact  
587 on the islet dynamics, which is consistent with the oscillation frequency again being formed by a  
588 weighted combination of all cells across the islet.

589 We did not observe a complete overlap between cells that show earlier/delayed  $[Ca^{2+}]$  oscillations  
590 and cells with faster/slower intrinsic  $[Ca^{2+}]$  oscillations, respectively. Similarly, while removal of the  
591 highest and lowest frequency cells changes the overall islet frequency to a greater degree, only removal  
592 of cells with delayed  $[Ca^{2+}]$  oscillations showed a change in frequency above that expected, given the  
593 frequency of the remaining cells. Thus, other properties of the islet also contribute to setting the islet  
594 oscillation frequency, and determining these properties remains to be determined.

595 Therefore, our simulations indicate that there is not a small population of rhythmic pacemaker cells  
596 within the islet. Rather, a large number of cells are needed to impact islet frequency. Of interest, the  
597 distribution of cells with faster or slower intrinsic  $[Ca^{2+}]$  oscillations in our simulation is distributed  
598 across the islet, whereas cells that show earlier or delayed  $[Ca^{2+}]$  oscillations exist within a specific  
599 region within the islet, often at the islet edge. While having only a minor impact, the spatial distribution  
600 of higher frequency cells was important in affecting islet  $[Ca^{2+}]$  oscillations. Whether intrinsically fast  
601 or slow oscillating cells show some spatially restricted distribution is unknown. A different spatial  
602 organization could potentially contribute to a greater control over islet frequency, especially if slow  
603 oscillators overlap with other properties of the islet that confer greater control over islet oscillation  
604 frequency.

605 We also speculate that the level of gap junction coupling for cells with slower or faster oscillations  
606 may be important: the time course of gap junction current indicates that faster oscillating cells transmit  
607 a greater hyperpolarizing current to neighboring cells earlier, as compared to slower oscillating cells.  
608 This may explain why the islet oscillation active phase duration trends closer to those cells with a  
609 higher frequency and thus shorter active phase duration. However, given the lower gap junction current  
610 in the silent phase, this appears not to be sufficient to disproportionately impact the oscillation  
611 frequency.

612  
613 **Summary.** Overall, the results from this study show how small populations of highly functional cells  
614 impact islet function via gap junction electrical coupling. Our simulations suggest that both a small  
615 subpopulation of metabolically active cells or the most metabolically active subset of cells within a  
616 continuous distribution are unable to maintain elevated  $[Ca^{2+}]$  across the islet via gap junction  
617 coupling. Further, a small population or subset of cells that shows early  $[Ca^{2+}]$  elevations or that have a  
618 higher oscillation frequency are also unable to act as rhythmic pacemakers to drive oscillatory  $[Ca^{2+}]$   
619 dynamics. As such the mechanism(s) by which these cells may act to impact islet function should be  
620 further investigated.

621

## 622 **Methods**

623

624 **Coupled  $\beta$ -cell electrical activity model**– The coupled  $\beta$ -cell model was described previously [35]  
625 and adapted from the published Cha-Noma single cell model [53, 54]. All code was written in C++ and  
626 run on the SUMMIT supercomputer (University of Colorado Boulder). Model code is included in  
627 supplemental information (Files S1). All simulations are run at 8mM glucose unless otherwise noted.

628 The membrane potential ( $V_i$ ) for each  $\beta$ -cell  $i$  is related to the sum of individual ion currents as  
629 described by [53]:

630

$$631 \quad C_m \frac{dV_i}{dt} = I_{Cav} + I_{TRPM} + I_{SOC} + I_{bNSC} + I_{KDr} + I_{KCa(SK)} \\ 632 \quad + I_{K_{ATP}} + I_{NaK} + I_{NaCa} + I_{PMCA} + I_{NaCa} + I_{Coup} \quad (1)$$

633

634 Where the gap junction mediated current  $I_{Coup}$  [34] is:

635

$$636 \quad I_{Coup} = \sum_i g_{Coup}^{ij} (V_i - V_j) \quad (2)$$

637

638 **Modelling GK activity**– The flux of glycolysis  $J_{glc}$ , which is limited by the rate of GK activity in the  
639  $\beta$ -cell, is described as:

640

$$641 \quad J_{glc} = k_{glc} \cdot f_{glc} \cdot ([Re_{tot}] - [Re]) \quad (3)$$

642

643 Where  $k_{glc}$  is the maximum rate of glycolysis (equivalent to GK activity), which was simulated as a  
644 continuous Gaussian distribution with a mean of  $0.000126 \text{ ms}^{-1}$  and standard deviation of 25% of the  
645 mean (unless indicated).  $[Re_{tot}] = 10\text{mM}$ , the total amount of pyrimidine nucleotides. The ATP and  
646 glucose dependence of glycolysis (GK activity) is:

647

$$648 \quad f_{glc} = \frac{1}{1 + \frac{K_{mATP}}{[ATP]_i}} \cdot \frac{1}{1 + \left(\frac{K_G}{[G]}\right)^{hgl}} \quad (4)$$

649

650 Where  $[G]$  is the extracellular concentration of glucose,  $hgl$  is the hill coefficient,  $K_G$  is the half  
651 maximal concentration of glucose, and  $K_{mATP}$  is the half maximal concentration of ATP.

652 For simulations with changes in variation in GK, the mean remained the same at  $0.000126 \text{ ms}^{-1}$ ,  
653 but standard deviation of 1% or 50% of the mean was used.

654

655 **Hyperpolarizing cell populations**– Hyperpolarization of cells was induced by including a  $V$ -  
656 independent leak current  $I_{hyper}$  that hyperpolarizes the cell [36], described as:

657

$$658 \quad I_{hyper} = g_{hyper} * (V - V_{hyper}) \quad (5)$$

659

660 Where  $g_{\text{hyper}}$  is the hyperpolarizing conductance which is zero in the absence of the applied  
661 hyperpolarizing current and is  $g_{\text{hyper}}' (1-p_{\text{OKATP}})$  during applied hyperpolarization. The number of cells  
662 that were hyperpolarized were defined as the fraction  $P_{\text{hyp}}$  multiplied by the number of cells,  $N$  (1000 in  
663 all simulations).

664

665 **For bimodal distribution of GK** – The bimodal distribution of GK can be described by the following  
666 2 equations.

$$667 \quad k_{\text{glc}_{\text{GKHigh}}} = 3 * k_{\text{glc}} \quad (6)$$

668

$$669 \quad (k_{\text{glc}_{\text{GKLow}}} * P_{\text{Low}} * N + k_{\text{glc}_{\text{GKHigh}}} * P_{\text{High}} * N) / N = k_{\text{glc}} \quad (7)$$

670

671 Where  $k_{\text{glc}_{\text{GKHigh}}}$  is the mean rate of glycolysis for the  $\text{GK}_{\text{High}}$  population and is 3 times the islet mean,  
672  $k_{\text{glc}}$ . The mean rate of glycolysis for the  $\text{GK}_{\text{Low}}$  population,  $k_{\text{glc}_{\text{GKLow}}}$ , is scaled so that the islet mean,  
673  $k_{\text{glc}}$  of the whole simulated islet remains the same at  $0.000126 \text{ ms}^{-1}$  (7).  $P_{\text{Low}}$ , the percent of  $\text{GK}_{\text{Low}}$   
674 cells in the simulation, is 90%, and  $P_{\text{High}}$ , the percent of  $\text{GK}_{\text{High}}$  cells, is 10% in all bimodal simulations.  
675  $N$  is the number of cells in the simulation (1000). The standard deviation of  $k_{\text{glc}_{\text{GKHigh}}}$  and  $k_{\text{glc}_{\text{GKLow}}}$  is  
676 1% of the mean for bimodal simulations.

677

678 **Modelling changes in coupling**–

679 Heterogeneity in Cx36 gap junctions is modeled as a  $\gamma$ -distribution with parameters  $k=\theta=4$  as  
680 described previously [29] and scaled to an average  $g_{\text{Coup}}$  between cells = 120pS.

681 Simulations where  $k_{\text{glc}}$  and  $g_{\text{Coup}}$  are correlated, the values for  $k_{\text{glc}}$  and  $g_{\text{Coup}}$  for the 1000 cells are  
682 randomly calculated, then these values are ordered for both  $k_{\text{glc}}$  and  $g_{\text{Coup}}$  and paired together so that  
683 the highest  $k_{\text{glc}}$  and highest  $g_{\text{Coup}}$  are pairs. The paired  $k_{\text{glc}}$  and  $g_{\text{Coup}}$  values are then randomly  
684 distributed to the cells in the simulation.

685 For simulations where  $g_{\text{Coup}}$  is described as a bimodal distribution, the  $\text{GK}_{\text{High}}$  cells are given 3x the  
686 average coupling and then the distribution is scaled so that mean  $g_{\text{Coup}}$  remains 120pS similarly to  
687 equations (6) and (7).

688 For simulations where cells are removed, the conductance,  $g_{\text{coup}}$ , of the cells to be removed is set to  
689 0 pS. Removed cells are excluded from subsequent islet analysis.

690

691 **Determining high and low phase cells** –To determine low phase and high phase cells, one full  $[\text{Ca}^{2+}]$   
692 oscillation is taken between time points 300 sec to 400 sec. This time point ensures the model and  
693 frequencies are stable and in the second phase of  $[\text{Ca}^{2+}]$  oscillations. A cross correlation is used to  
694 determine the time delay of each cell time course compared to the mean  $[\text{Ca}^{2+}]$  across the islet, using  
695 `xcorr()` in MATLAB. A negative delay is therefore equivalent to an earlier oscillation. The low phase  
696 cells are determined as the cells with the most negative time delay and the high phase cells are  
697 determined as the cells with the most positive time delay. If the cutoff occurs where multiple cells have  
698 the same delay, then a random cell is chosen from the cells with the same lag.

699 **Modelling bimodal for low phase cells** –The mean values of the low phase and non-low phase cells  
700 in the continuous distribution was used to define a new bimodal distribution as described in Table S1.  
701 All standard deviations are 1% of the mean. For more information on parameters see [55]. The ‘low  
702 phase’ cell population,  $N_{\text{lowphase}}$  comprised 10% of the islet (left column), and the  $N_{\text{non-low}}$  comprised  
703 the other 90% (right column).

704  
705 **Simulation data analysis**– All simulation data analysis was performed using custom MATLAB  
706 scripts. The first 1500 time points (150 sec) were excluded to allow the model to reach a stable state.

707 Fraction Active was determined by calculating the fraction of cells that were active relative to the  
708 total number of simulated cells (1000). Cells were considered active if membrane potential,  $[\text{Ca}^{2+}]$   
709 exceeded  $0.165\mu\text{M}$  at any point in the time course.

710 Duty Cycle was determined as the fraction of the  $[\text{Ca}^{2+}]$  oscillations spent above a threshold value  
711 during the time course analyzed. This threshold value was determined as 50% of the average amplitude  
712 of  $[\text{Ca}^{2+}]$  in an islet simulated at 8mM glucose with 25% variation in GK activity or time above 70% of  
713 the maximum  $[\text{Ca}^{2+}]$  (S9 Fig). Duty cycle was reported as the mean across all cells in the simulated  
714 islet.

715 Frequency of a cell in the islet was determined by taking the  $[\text{Ca}^{2+}]$  time-course between times 150  
716 sec and 400 sec and identifying the first 2 peaks. The peak to peak time was determined, and this  
717 oscillation period was inverted to calculate the frequency. For whole islet frequency calculations, the  
718 coupling in the islet is  $g_{\text{Coup}}=120\text{pS}$  and the mean islet frequency is calculated over all cells in the  
719 simulation.

720 Intrinsic frequencies were determined using simulations where the mean coupling conductance of  
721 all cells in the simulation is  $g_{\text{Coup}}=0\text{pS}$  so that all cells oscillate on their own without influence from  
722 other cells within the simulation. When determining low and high frequency cells in the simulation,  
723 only active cells were used.

724 Expected Frequency was determined by finding the average intrinsic frequencies of the cells  
725 ( $g_{\text{Coup}}=0\text{pS}$ ) that are included in the simulation. These values are then compared to the simulation  
726 where  $g_{\text{Coup}}=120\text{pS}$ .

727 Total gap junction current for a cell was calculated by summing the gap junction current over each  
728 connection between the cell and all of its neighbors, as in equation (2). The total membrane current  
729 was calculated as the sum over each current for that cell, as in equation (1).

730 Active, silent, upstroke and downstroke phases were chosen manually. The Area Under the Curve  
731 (AUC) was calculated using the trapz() function in MATLAB, which calculates trapezoidal integration  
732 over the time period. AUC was calculated for each cell in the given decile and then averaged over  
733 those cells.

734 Active phase duration for one oscillation was determined for each cell, as the total time  $[\text{Ca}^{2+}]$  was  
735 above 70% of the maximum value, divided by the number of oscillations over the duration assessed.  
736 The silent phase duration was similarly calculated as the total of time  $[\text{Ca}^{2+}]$  was below 40% of  
737 maximum value.

738  
739 **Statistical analysis**– All statistical analysis was performed in Prism (GraphPad). Either a Student’s t-  
740 test (or Welch’s t-test for significantly difference variances) or a one-way ANOVA with Tukey post-

741 hoc analysis was utilized to test for significant differences for simulation results. Paired t-test or  
742 repeated measures ANOVA was used anywhere the results were compared with a simulated matching  
743 control islet or groups within the same islet, e.g. before a population was either hyperpolarized or  
744 uncoupled. Data is reported as mean  $\pm$  s.e.m. (standard error in the mean) unless otherwise indicated.  
745

746 **Acknowledgements**

747 The authors thank Dr David J Hodson (University of Birmingham, UK) and Dr Victoria Salem  
748 (Imperial College London, UK) for reviewing this manuscript and for providing helpful comments and  
749 suggestions. The authors are also grateful for utilization of the SUMMIT supercomputer from the  
750 University of Colorado Boulder Research Computing Group, which is supported by the National  
751 Science Foundation (awards ACI-1532235 and ACI-1532236), the University of Colorado Boulder,  
752 and Colorado State University.

753

754 **Author contributions**

755 Conceptualization and data curation: JMD, RKP. Funding acquisition, project administration and  
756 supervision: RKP. Formal analysis and investigation: JMD, JKB. Methodology: JMD, JKB, RKP.  
757 Resources, software, validation and visualization: JMD. Writing, review and editing: JMD, RKP.

758

## 759 **References**

760

- 761 1. Jackson MDB, Duran-Nebreda S, Bassel GW. Network-based approaches to quantify multicellular  
762 development. *J R Soc Interface*. 2017;14(135).
- 763 2. Kulkarni RN. The islet beta-cell. *Int J Biochem Cell Biol*. 2004;36(3):365-71.
- 764 3. Alberti KG, Zimmet PZ. Definition, diagnosis and classification of diabetes mellitus and its  
765 complications. Part 1: diagnosis and classification of diabetes mellitus provisional report of a WHO  
766 consultation. *Diabet Med*. 1998;15(7):539-53.
- 767 4. Thorens B, Guillam MT, Beermann F, Burcelin R, Jaquet M. Transgenic reexpression of GLUT1  
768 or GLUT2 in pancreatic beta cells rescues GLUT2-null mice from early death and restores normal  
769 glucose-stimulated insulin secretion. *J Biol Chem*. 2000;275(31):23751-8.
- 770 5. Thorens B. GLUT2, glucose sensing and glucose homeostasis. *Diabetologia*. 2015;58(2):221-32.
- 771 6. Meglasson MD, Matschinsky FM. Pancreatic islet glucose metabolism and regulation of insulin  
772 secretion. *Diabetes Metab Rev*. 1986;2(3-4):163-214.
- 773 7. Ashcroft FM, Rorsman P. Electrophysiology of the pancreatic beta-cell. *Prog Biophys Mol Biol*.  
774 1989;54(2):87-143.
- 775 8. Henquin JC. Triggering and amplifying pathways of regulation of insulin secretion by glucose.  
776 *Diabetes*. 2000;49(11):1751-60.
- 777 9. Bonnefond A, Froguel P. Rare and common genetic events in type 2 diabetes: what should  
778 biologists know? *Cell Metab*. 2015;21(3):357-68.
- 779 10. Farnsworth NL, Walter RL, Hemmati A, Westacott MJ, Benninger RK. Low Level Pro-  
780 inflammatory Cytokines Decrease Connexin36 Gap Junction Coupling in Mouse and Human Islets  
781 through Nitric Oxide-mediated Protein Kinase Cdelta. *J Biol Chem*. 2016;291(7):3184-96.
- 782 11. Hodson DJ, Mitchell RK, Bellomo EA, Sun G, Vinet L, Meda P, et al. Lipotoxicity disrupts  
783 incretin-regulated human beta cell connectivity. *J Clin Invest*. 2013;123(10):4182-94.
- 784 12. Serre-Beinier V, Le Gurun S, Belluardo N, Trovato-Salinaro A, Charollais A, Haefliger JA, et al.  
785 Cx36 preferentially connects beta-cells within pancreatic islets. *Diabetes*. 2000;49(5):727-34.
- 786 13. Speier S, Gjinovci A, Charollais A, Meda P, Rupnik M. Cx36-mediated coupling reduces beta-cell  
787 heterogeneity, confines the stimulating glucose concentration range, and affects insulin release  
788 kinetics. *Diabetes*. 2007;56(4):1078-86.
- 789 14. Serre-Beinier V, Bosco D, Zulianello L, Charollais A, Caille D, Charpentier E, et al. Cx36 makes  
790 channels coupling human pancreatic beta-cells, and correlates with insulin expression. *Hum Mol*  
791 *Genet*. 2009;18(3):428-39.
- 792 15. Benninger RK, Head WS, Zhang M, Satin LS, Piston DW. Gap junctions and other mechanisms of  
793 cell-cell communication regulate basal insulin secretion in the pancreatic islet. *J Physiol*. 2011;589(Pt  
794 22):5453-66.
- 795 16. Pipeleers DG. Heterogeneity in pancreatic beta-cell population. *Diabetes*. 1992;41(7):777-81.
- 796 17. Jetton TL, Magnuson MA. Heterogeneous expression of glucokinase among pancreatic beta cells.  
797 *Proc Natl Acad Sci U S A*. 1992;89(7):2619-23.
- 798 18. Bosco D, Meda P. Actively synthesizing beta-cells secrete preferentially after glucose stimulation.  
799 *Endocrinology*. 1991;129(6):3157-66.

- 800 19. Van Schravendijk CF, Kiekens R, Pipeleers DG. Pancreatic beta cell heterogeneity in glucose-  
801 induced insulin secretion. *J Biol Chem.* 1992;267(30):21344-8.
- 802 20. Salomon D, Meda P. Heterogeneity and contact-dependent regulation of hormone secretion by  
803 individual B cells. *Exp Cell Res.* 1986;162(2):507-20.
- 804 21. Wojtuszczyz A, Armanet M, Morel P, Berney T, Bosco D. Insulin secretion from human beta cells  
805 is heterogeneous and dependent on cell-to-cell contacts. *Diabetologia.* 2008;51(10):1843-52.
- 806 22. Zhang M, Goforth P, Bertram R, Sherman A, Satin L. The Ca<sup>2+</sup> dynamics of isolated mouse beta-  
807 cells and islets: implications for mathematical models. *Biophys J.* 2003;84(5):2852-70.
- 808 23. Bader E, Migliorini A, Gegg M, Moruzzi N, Gerdes J, Roscioni SS, et al. Identification of  
809 proliferative and mature beta-cells in the islets of Langerhans. *Nature.* 2016;535(7612):430-4.
- 810 24. van der Meulen T, Mawla AM, DiGruccio MR, Adams MW, Nies V, Dolleman S, et al. Virgin  
811 Beta Cells Persist throughout Life at a Neogenic Niche within Pancreatic Islets. *Cell Metab.*  
812 2017;25(4):911-26 e6.
- 813 25. Aguayo-Mazzucato C, van Haaren M, Mruk M, Lee TB, Jr., Crawford C, Hollister-Lock J, et al.  
814 beta Cell Aging Markers Have Heterogeneous Distribution and Are Induced by Insulin Resistance.  
815 *Cell Metab.* 2017;25(4):898-910 e5.
- 816 26. Rui J, Deng S, Arazi A, Perdigoto AL, Liu Z, Herold KC. beta Cells that Resist Immunological  
817 Attack Develop during Progression of Autoimmune Diabetes in NOD Mice. *Cell Metab.*  
818 2017;25(3):727-38.
- 819 27. Dorrell C, Schug J, Canaday PS, Russ HA, Tarlow BD, Grompe MT, et al. Human islets contain  
820 four distinct subtypes of beta cells. *Nat Commun.* 2016;7:11756.
- 821 28. Nasteska D, Hodson DJ. The role of beta cell heterogeneity in islet function and insulin release. *J*  
822 *Mol Endocrinol.* 2018;61(1):R43-R60.
- 823 29. Westacott MJ, Ludin NWF, Benninger RKP. Spatially Organized beta-Cell Subpopulations  
824 Control Electrical Dynamics across Islets of Langerhans. *Biophys J.* 2017;113(5):1093-108.
- 825 30. Johnston NR, Mitchell RK, Haythorne E, Pessoa MP, Semplici F, Ferrer J, et al. Beta Cell Hubs  
826 Dictate Pancreatic Islet Responses to Glucose. *Cell Metab.* 2016;24(3):389-401.
- 827 31. Salem V, Silva LD, Suba K, Georgiadou E, Neda Mousavy Gharavy S, Akhtar N, et al. Leader  $\beta$ -  
828 cells coordinate Ca<sup>2+</sup> dynamics across pancreatic islets in vivo. *Nature Metabolism.* 2019;1(6):615-29.
- 829 32. Satin LS, Zhang Q, Rorsman P. "Take Me To Your Leader": An Electrophysiological Appraisal of  
830 the Role of Hub Cells in Pancreatic Islets. *Diabetes.* 2020;69(5):830-6.
- 831 33. Rutter GA, Ninov N, Salem V, Hodson DJ. Comment on Satin et al. "Take Me To Your Leader":  
832 An Electrophysiological Appraisal of the Role of Hub Cells in Pancreatic Islets. *Diabetes* 2020;69:830-  
833 836. *Diabetes.* 2020;69(9):e10-e1.
- 834 34. Hraha TH, Westacott MJ, Pozzoli M, Notary AM, McClatchey PM, Benninger RK. Phase  
835 transitions in the multi-cellular regulatory behavior of pancreatic islet excitability. *PLoS Comput Biol.*  
836 2014;10(9):e1003819.
- 837 35. Dwulet JM, Ludin NWF, Piscopio RA, Schleicher WE, Moua O, Westacott MJ, et al. How  
838 Heterogeneity in Glucokinase and Gap-Junction Coupling Determines the Islet [Ca(2+)] Response.  
839 *Biophys J.* 2019;117(11):2188-203.



- 840 36. Notary AM, Westacott MJ, Hraha TH, Pozzoli M, Benninger RK. Decreases in Gap Junction  
841 Coupling Recovers Ca<sup>2+</sup> and Insulin Secretion in Neonatal Diabetes Mellitus, Dependent on Beta Cell  
842 Heterogeneity and Noise. *PLoS Comput Biol*. 2016;12(9):e1005116.
- 843 37. Bennett BD, Jetton TL, Ying G, Magnuson MA, Piston DW. Quantitative subcellular imaging of  
844 glucose metabolism within intact pancreatic islets. *J Biol Chem*. 1996;271(7):3647-51.
- 845 38. Silva JR, Cooper P, Nichols CG. Modeling K<sub>A</sub>ATP--dependent excitability in pancreatic islets.  
846 *Biophys J*. 2014;107(9):2016-26.
- 847 39. Bertram R, Satin L, Zhang M, Smolen P, Sherman A. Calcium and glycolysis mediate multiple  
848 bursting modes in pancreatic islets. *Biophys J*. 2004;87(5):3074-87.
- 849 40. Benninger RK, Hutchens T, Head WS, McCaughey MJ, Zhang M, Le Marchand SJ, et al. Intrinsic  
850 islet heterogeneity and gap junction coupling determine spatiotemporal Ca(2)(+) wave dynamics.  
851 *Biophys J*. 2014;107(11):2723-33.
- 852 41. Lei CL, Kellard JA, Hara M, Johnson JD, Rodriguez B, Briant LJB. Beta-cell hubs maintain  
853 Ca(2+) oscillations in human and mouse islet simulations. *Islets*. 2018;10(4):151-67.
- 854 42. Kiekens R, In 't Veld P, Mahler T, Schuit F, Van De Winkel M, Pipeleers D. Differences in glucose  
855 recognition by individual rat pancreatic B cells are associated with intercellular differences in glucose-  
856 induced biosynthetic activity. *J Clin Invest*. 1992;89(1):117-25.
- 857 43. Wellen KE, Thompson CB. Cellular metabolic stress: considering how cells respond to nutrient  
858 excess. *Mol Cell*. 2010;40(2):323-32.
- 859 44. Emfinger CH, Lorincz R, Wang Y, York NW, Singareddy SS, Ikle JM, et al. Beta-cell excitability  
860 and excitability-driven diabetes in adult Zebrafish islets. *Physiol Rep*. 2019;7(11):e14101.
- 861 45. Miller AC, Whitebitch AC, Shah AN, Marsden KC, Granato M, O'Brien J, et al. A genetic basis  
862 for molecular asymmetry at vertebrate electrical synapses. *Elife*. 2017;6.
- 863 46. Head WS, Orseth ML, Nunemaker CS, Satin LS, Piston DW, Benninger RK. Connexin-36 gap  
864 junctions regulate in vivo first- and second-phase insulin secretion dynamics and glucose tolerance in  
865 the conscious mouse. *Diabetes*. 2012;61(7):1700-7.
- 866 47. van der Meulen T, Donaldson CJ, Caceres E, Hunter AE, Cowing-Zitron C, Pound LD, et al.  
867 Urocortin3 mediates somatostatin-dependent negative feedback control of insulin secretion. *Nat Med*.  
868 2015;21(7):769-76.
- 869 48. Caicedo A. Paracrine and autocrine interactions in the human islet: more than meets the eye. *Semin*  
870 *Cell Dev Biol*. 2013;24(1):11-21.
- 871 49. Rubi B, Ljubicic S, Pournourmohammadi S, Carobbio S, Armanet M, Bartley C, et al. Dopamine  
872 D<sub>2</sub>-like receptors are expressed in pancreatic beta cells and mediate inhibition of insulin secretion. *J*  
873 *Biol Chem*. 2005;280(44):36824-32.
- 874 50. Briant LJB, Reinbothe TM, Spiliotis I, Miranda C, Rodriguez B, Rorsman P. delta-cells and beta-  
875 cells are electrically coupled and regulate alpha-cell activity via somatostatin. *J Physiol*.  
876 2018;596(2):197-215.
- 877 51. Nasteska D, Fine NHF, Ashford FB, Cuzzo F, Vioria K, Smith G, et al. Mature and immature  $\beta$ -  
878 cells both contribute to islet function and insulin release. 2020;PREPRINT (Version 1) available at  
879 Research Square DOI <https://doi.org/10.21203/rs.3.rs-40718/v1>.
- 880 52. Bertram R, Previte J, Sherman A, Kinard TA, Satin LS. The phantom burster model for pancreatic  
881 beta-cells. *Biophys J*. 2000;79(6):2880-92.

- 882 53. Cha CY, Nakamura Y, Himeno Y, Wang JW, Fujimoto S, Inagaki N, et al. Ionic mechanisms and  
883 Ca<sup>2+</sup> dynamics underlying the glucose response of pancreatic beta cells: a simulation study. *J Gen*  
884 *Physiol.* 2011;138(1):21-37.
- 885 54. Cha CY, Santos E, Amano A, Shimayoshi T, Noma A. Time-dependent changes in membrane  
886 excitability during glucose-induced bursting activity in pancreatic beta cells. *J Gen Physiol.*  
887 2011;138(1):39-47.
- 888 55. Cha CY, Nakamura Y, Himeno Y, Wang J, Fujimoto S, Inagaki N, et al. Ionic mechanisms and  
889 Ca<sup>2+</sup> dynamics underlying the glucose response of pancreatic beta cells: a simulation study. *J Gen*  
890 *Physiol.* 2011;138(1):21-37.
- 891
- 892

## 893 Supporting information captions

894

895 **S1 Figure. Histograms of GK activity ( $k_{glc}$ ) and  $g_{Coup}$  for all continuous and bimodal**  
896 **distributions in GK activity for Fig 1-3.** A). All continuous distributions' histograms. Left: Average  
897 frequency of cells at varying GK rate ( $k_{glc}$ ) for simulations that have different standard deviations in  
898 GK activity from Fig 1. Right: Corresponding histogram of average frequency of cells at varying  
899 coupling conductance ( $g_{Coup}$ ). B). As in A but for simulations with a bimodal distribution of GK  
900 activity from Fig 2. C). As in A for simulations with bimodal distribution of GK activity and correlated  
901 GK and  $g_{Coup}$  from Fig 3 top panel. D). As in A for simulations with bimodal distribution of GK  
902 activity and bimodal  $g_{Coup}$  from Fig 3 bottom panel. Data representative of 4-5 simulations with  
903 differing random number seeds.

904

905 **S2 Figure. Additional simulations with continuous distribution in GK activity with correlated**  
906  **$g_{Coup}$  and  $g_{KATP}$ .** A). Scatterplot of  $g_{Coup}$  vs.  $k_{glc}$  for each cell from a representative simulation where  
907  $g_{Coup}$  is correlated with  $k_{glc}$  for simulation where GK activity is modeled as a continuous distribution.  
908 B). Fraction of cells showing elevated  $[Ca^{2+}]$  activity (active cells) vs. the percentage of cells  
909 hyperpolarized in islet from simulations with a continuous distribution in  $k_{glc}$  with correlated  $g_{Coup}$  and  
910  $k_{glc}$  as in A. Hyperpolarized cells are chosen based on their GK rate which is correlated to  $g_{Coup}$ . C). As  
911 in B. but comparing hyperpolarization in high GK cells in the presence (B) and absence (Fig 1c) of  
912 correlations in  $g_{Coup}$ . D). as in A but from a simulation where  $g_{Coup}$  and  $k_{glc}$  and  $g_{KATP}$  ( $K_{ATP}$  channel  
913 conductance) are correlated. E). As in B. but for simulations where  $g_{Coup}$  and  $k_{glc}$  and  $g_{KATP}$  are  
914 correlated. F). As in C. but comparing high GK cells hyperpolarization from Fig 1c to high GK  
915 hyperpolarization from simulations where  $g_{Coup}$  and  $k_{glc}$  and  $g_{KATP}$  are correlated (E). Error bars are  
916 mean  $\pm$  s.e.m. Repeated measures one-way ANOVA with Tukey post-hoc analysis was performed for  
917 simulations in B and C (if there were any missing values a mixed effects model was used) and a  
918 Student's t-test was performed for C and F (Welches t-test for unequal variances was used when  
919 variances were determined to be statistically different using an F-test) to test for significance.  
920 Significance values: ns indicates not significant ( $p > .05$ ), \* indicates significant difference ( $p < .05$ ), \*\*  
921 indicates significant difference ( $p < .01$ ), \*\*\* indicates significant difference ( $p < .001$ ), \*\*\*\* indicates  
922 significant difference ( $p < .0001$ ). Data representative of 5 simulations with differing random number  
923 seeds.

924

925 **S3 Figure. Simulations predicting effect of 50% reduction in coupling in simulations with**  
926 **continuous and bimodal distributions in GK activity.** A). Fraction of cells showing elevated  $[Ca^{2+}]$   
927 activity (active cells) vs. the percentage of cells hyperpolarized in islet from simulations with a  
928 continuous distribution as in Fig 1c but with 50% reduction in average coupling conductance (60pS)  
929 for all cells. Hyperpolarized cells are chosen based on their GK rate. B). As in A. but comparing  
930 hyperpolarization in high GK cells in simulations with full coupling (120pS – Fig 1c) and reduced  
931 coupling (60pS) from A. C). as in A but for bimodal simulations with reduced coupling (60pS). D). As  
932 in B but comparing bimodal distributions in GK with full coupling (120pS) from Fig 2d to bimodal  
933 simulations with reduced coupling (60pS) from C. Error bars are mean  $\pm$  s.e.m. Student's paired t-test  
934 was performed to test for significance for all simulations. Significance values: ns indicates not

935 significant ( $p > .05$ ), \* indicates significant difference ( $p < .05$ ), \*\* indicates significant difference  
936 ( $p < .01$ ), \*\*\* indicates significant difference ( $p < .001$ ), \*\*\*\* indicates significant difference. Data  
937 representative of 4-5 simulations with differing random number seeds.

938

939 **S4 Figure. Fraction of active cells in simulations where cells are uncoupled from the rest of the**  
940 **cells in the islet from Fig 4-6.** A). Fraction of cells showing elevated  $[Ca^{2+}]$  activity (active cells) in  
941 simulated islets vs. the percentage of cells uncoupled in islet from simulations in Fig 4. B). As in A but  
942 for simulations in Fig 5. C). As in A but for simulations in Fig 6. D). As in A but for simulations in S6  
943 Fig. Error bars are mean  $\pm$  s.e.m. Repeated measures one-way ANOVA was performed for simulations  
944 in A and B and a Student's paired t-test was performed for C and D to test for significance.  
945 Significance values: ns indicates not significant ( $p > .05$ ), \* indicates significant difference ( $p < .05$ ), \*\*  
946 indicates significant difference ( $p < .01$ ), \*\*\* indicates significant difference ( $p < .001$ ), \*\*\*\* indicates  
947 significant difference. Data representative of 5 simulations with differing random number seeds.

948

949 **S5 Figure. Random removal of cells vs. random removal of a region of cells.** A). Schematic  
950 showing which cells are chosen to be removed when a random selection of cells is chosen across the  
951 islet. B). Schematic showing which cells are chosen to be removed when a *random region* of cells is  
952 chosen. C). The frequency of the islet after removal of 0%, 10%, or 30% of randomly chosen cells or  
953 from a random region. Error bars are mean  $\pm$  s.e.m. Student's t-test was performed for 10% and a  
954 Welch's t-test for unequal variances was used to test for significance at 30% of cells removed.  
955 Significance values: ns indicates not significant ( $p > .05$ ), \* indicates significant difference ( $p < .05$ ), \*\*  
956 indicates significant difference ( $p < .01$ ), \*\*\* indicates significant difference ( $p < .001$ ), \*\*\*\* indicates  
957 significant difference. Data representative of 4-9 simulations with differing random number seeds.

958

959 **S6 Figure. Simulations predicting the effect of 50% reduction in coupling in simulations where**  
960 **high and low phase cells are removed under a continuous model.** A). Average frequency of islet  
961 when indicated populations of cells are removed from the simulated islet with 50% reduction in  
962 coupling conductance (60pS). B). Change in frequency of islet with indicated populations removed  
963 with respect to control islet with all cells present. C). Change in frequency when low phase cells are  
964 removed compared to average oscillation frequency of remaining cells that indicates the expected  
965 oscillation frequency. D). Same as C. but for simulations where high phase cells are removed. Error  
966 bars are mean  $\pm$  s.e.m. Repeated measures one-way ANOVA with Tukey post-hoc analysis was  
967 performed for simulations in A-B and a Student's paired t-test was performed for C and D to test for  
968 significance. Significance values: ns indicates not significant ( $p > .05$ ), \* indicates significant difference  
969 ( $p < .05$ ), \*\* indicates significant difference ( $p < .01$ ), \*\*\* indicates significant difference ( $p < .001$ ), \*\*\*\*  
970 indicates significant difference ( $p < .0001$ ). Data representative of 4 simulations with differing random  
971 number seeds.

972

973 **S7 Figure. Simulations predicting the effect of removing cells from individual populations of the**  
974 **bimodal model of low phase cells.** A). Average intrinsic oscillation frequencies of all cells, top 1% or  
975 10% of high frequency cells, or low frequency cells when re-simulated in the absence of gap junction  
976 coupling from bimodal model of phase. B). Phase lag from islet average of top 1% or 10% of high

977 frequency, low frequency cells, or random cells. C). Average  $k_{glc}$  from all cells, high frequency cells,  
978 or low frequency cells across simulated islet. D). Change in frequency of islet with indicated  
979 populations removed with respect to control islet with all cells present. E). Change in frequency when  
980 high frequency cells are removed compared to average oscillation frequency of remaining cells that  
981 indicates the expected oscillation frequency. F). Same as E. but for simulations where low frequency  
982 cells are removed. Error bars are mean  $\pm$  s.e.m. Repeated measures one-way ANOVA with Tukey  
983 post-hoc analysis was performed for simulations in A-D and a Student's paired t-test was performed  
984 for E and F to test for significance. Significance values: ns indicates not significant ( $p > .05$ ), \* indicates  
985 significant difference ( $p < .05$ ), \*\* indicates significant difference ( $p < .01$ ), \*\*\* indicates significant  
986 difference ( $p < .001$ ), \*\*\*\* indicates significant difference ( $p < .0001$ ). Data representative of 5  
987 simulations with differing random number seeds.

988  
989 **S8 Figure. Simulations predicting the effect of removing a region of high frequency cells from a**  
990 **bimodal model of low phase cells.** A). Schematic of frequency across simulated islet with a bimodal  
991 distribution in GK activity and a region of high frequency cells. B). Schematic of phase lag across  
992 simulated islet with a bimodal distribution in GK activity and a region of high frequency cells. C).  
993 Change in frequency of islet with indicated populations removed with respect to control islet with all  
994 cells present comparing bimodal model with a region of high frequency cells to a bimodal model with  
995 randomly distributed high frequency cells as in Fig 6. D). Change in frequency when high frequency  
996 region is removed compared to average oscillation frequency of remaining cells that indicates the  
997 expected oscillation frequency. Error bars represent mean  $\pm$  s.e.m. Student's t-test was performed for C  
998 and D (paired test) to test for significance. Significance values: ns indicates not significant ( $p > .05$ ), \*  
999 indicates significant difference ( $p < .05$ ), \*\* indicates significant difference ( $p < .01$ ), \*\*\* indicates  
1000 significant difference ( $p < .001$ ), \*\*\*\* indicates significant difference ( $p < .0001$ ). Data representative of  
1001 5 simulations with differing random number seeds.

1002  
1003 **S9 Figure. Analysis of changes in  $[Ca^{2+}]$  wave dynamics when high/low phase or high/low**  
1004 **frequency cells are removed from islet.** A). Change in mean duration of active phase when top 1%,  
1005 10% or 30% low/high phase cells are removed from simulations in Fig 4. B). Change in mean duration  
1006 of silent phase when top 1%, 10% or 30% low/high phase cells are removed from simulations in Fig 4.  
1007 C). Change in mean duty cycle when top 1%, 10% or 30% low/high phase cells are removed from  
1008 simulations in 4. D). As in A for simulations when high/low frequency cells are removed from Fig 5.  
1009 E). As in B for simulations when high/low frequency cells are removed from Fig 5. F). As in C for  
1010 simulations when high/low frequency cells are removed from Fig 5. Error bars are mean  $\pm$  s.e.m.  
1011 Paired Student's t-test was used to test for significance. Significance values: ns indicates not  
1012 significant ( $p > .05$ ), \* indicates significant difference ( $p < .05$ ), \*\* indicates significant difference  
1013 ( $p < .01$ ), \*\*\* indicates significant difference ( $p < .001$ ), \*\*\*\* indicates significant difference ( $p < .0001$ ).  
1014 Data representative of 5 simulations with differing random number seeds.

1015  
1016 **S1 Table: Parameters for bimodal phase low cell simulations.** Table describes the parameters that  
1017 have heterogeneous populations in computational model. The mean of each population is determined  
1018 from the mean parameter value from continuous simulations (See methods).

1019

1020 **S1 Files: Model code used in this study, in zip file.** Files include those used to generate data in figure

1021 1, figure 2, figure 4 and figure 6.

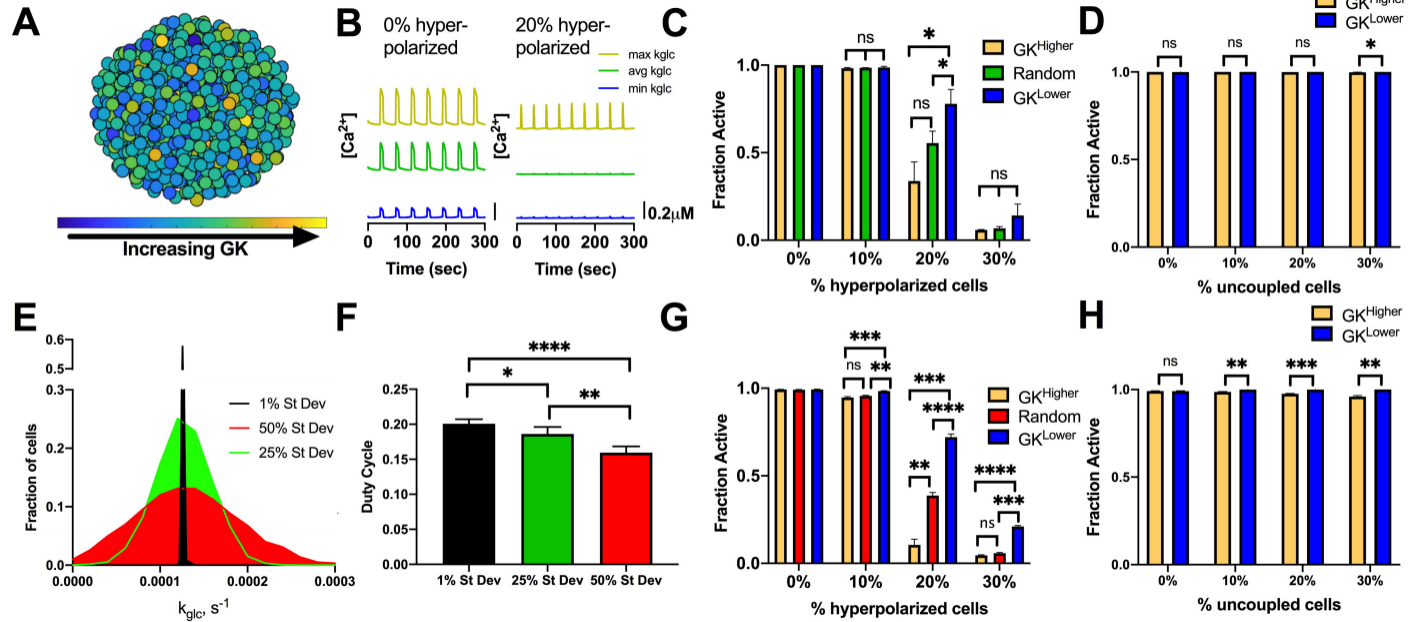

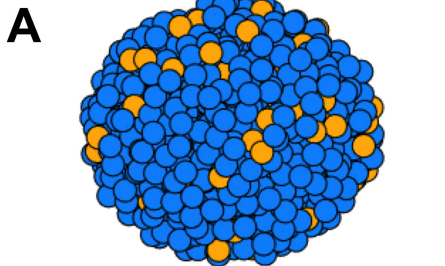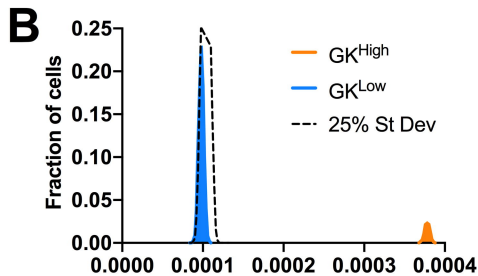

**C**

GK<sup>High</sup>
 GK<sup>Low</sup>

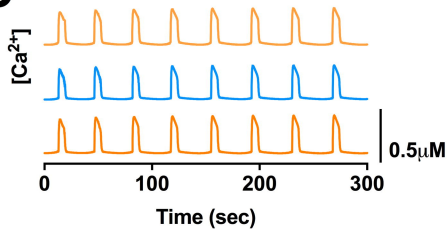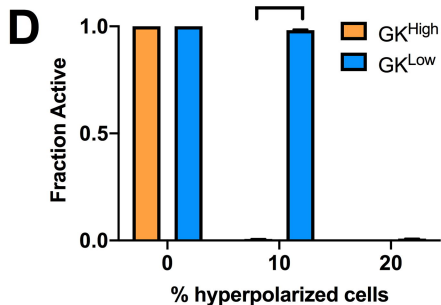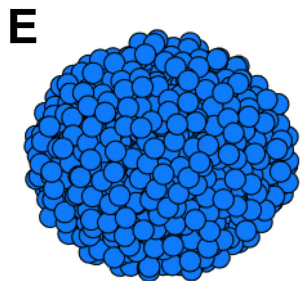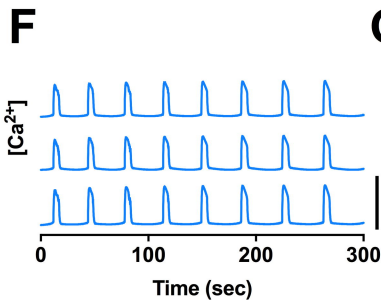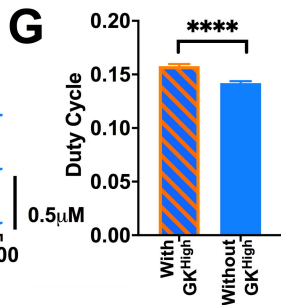



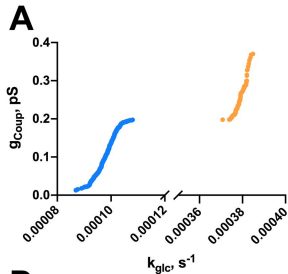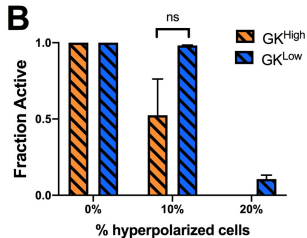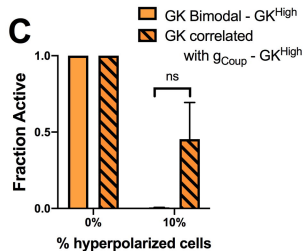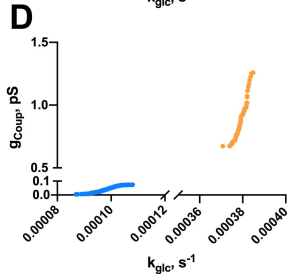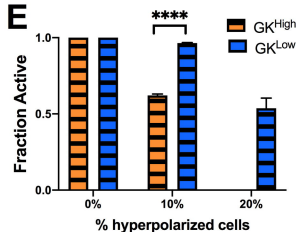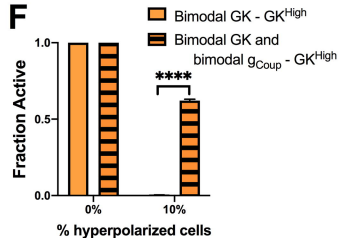

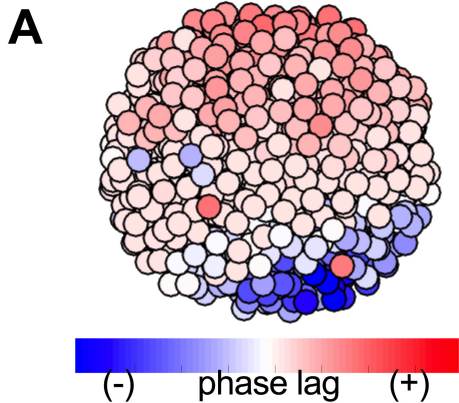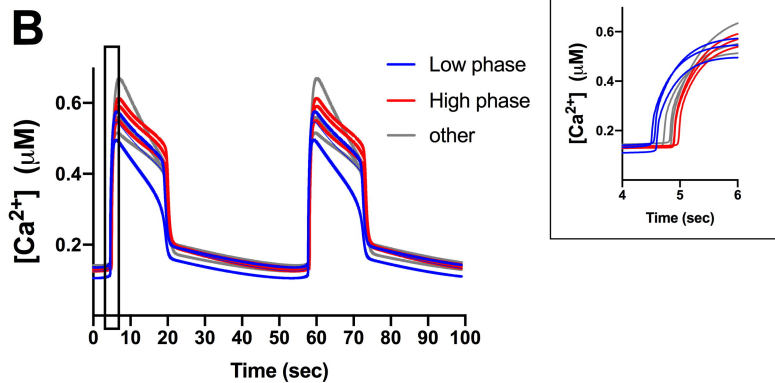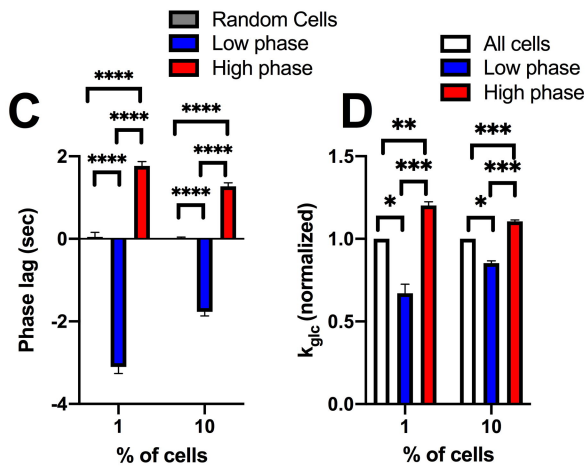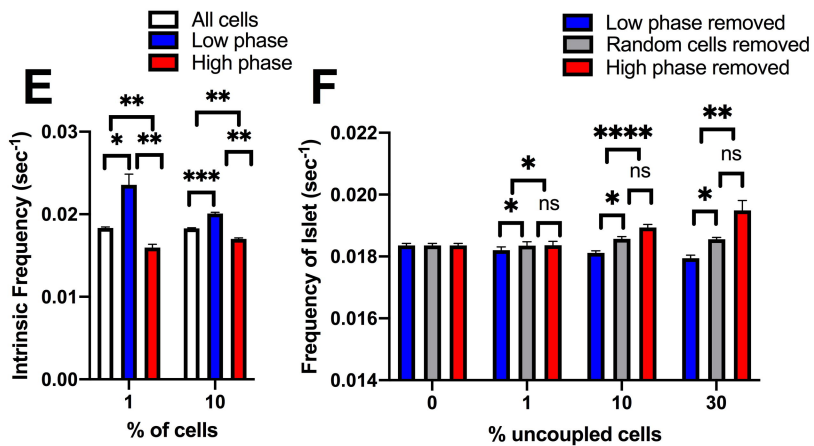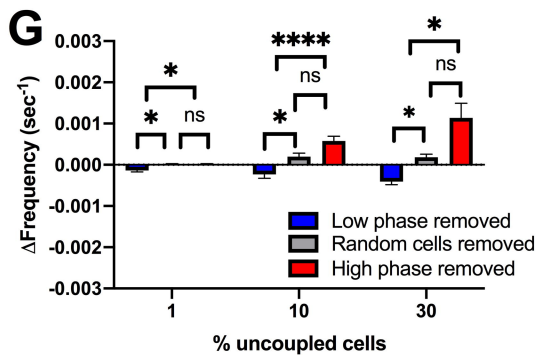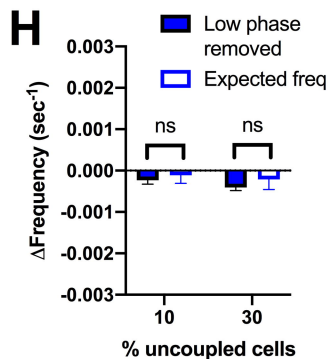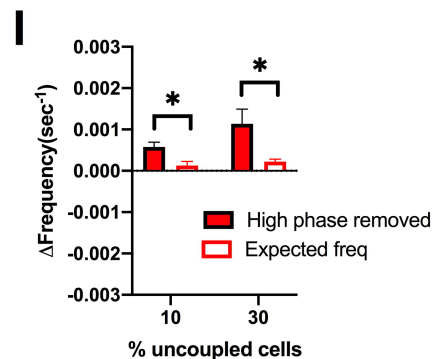

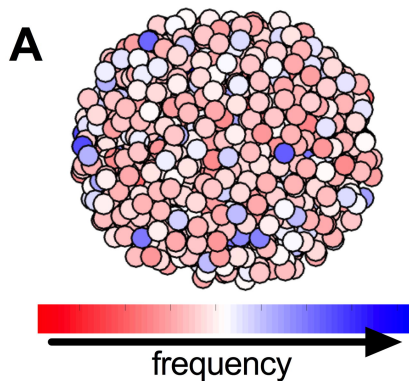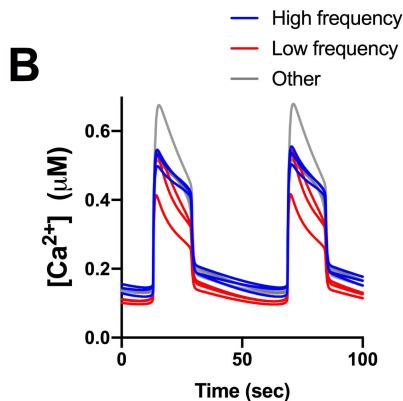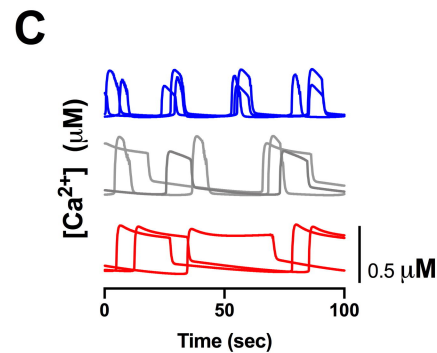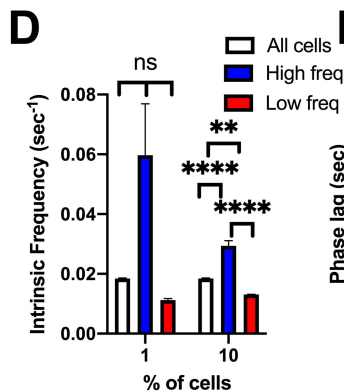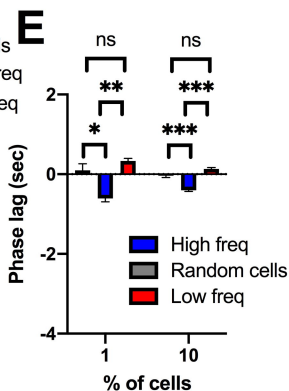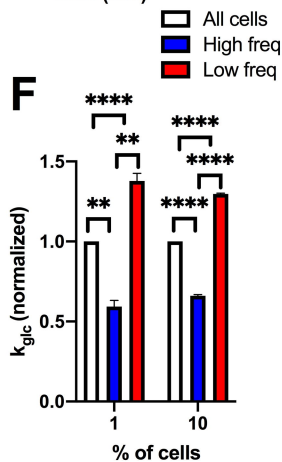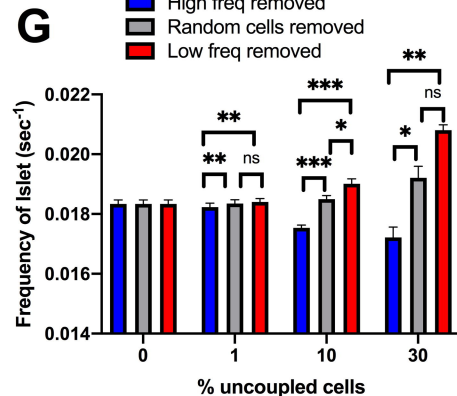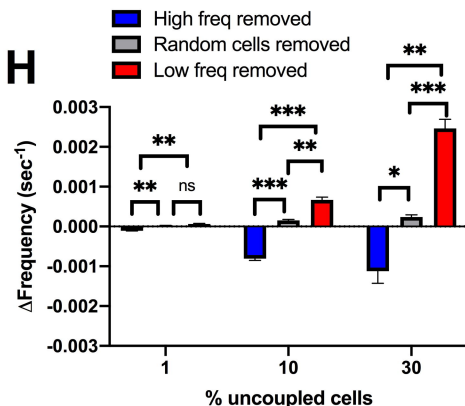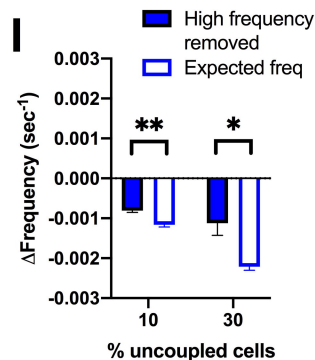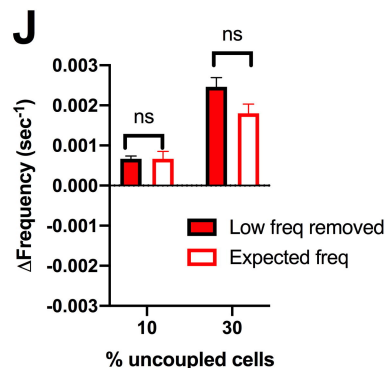

**A**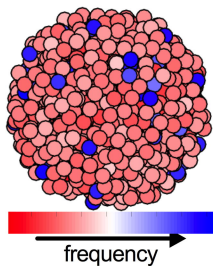**B**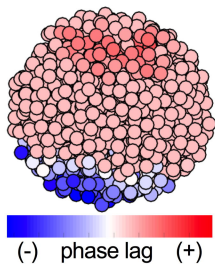**C**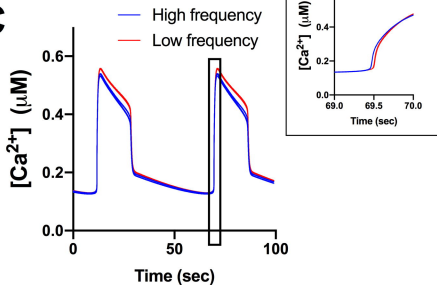**D**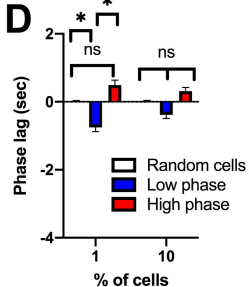**E**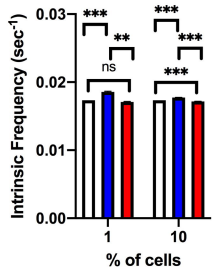**F**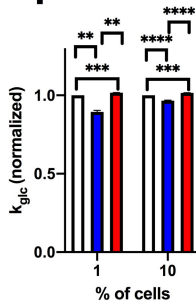**G**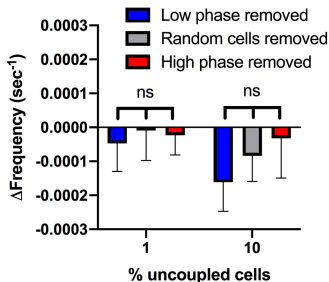**H**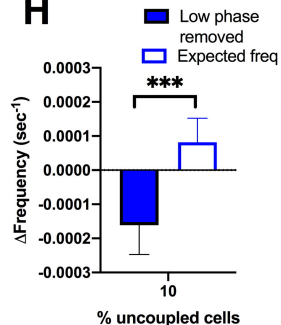**I**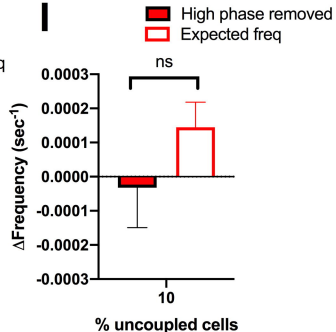

□ All cells    ■ Low phase    ■ High phase

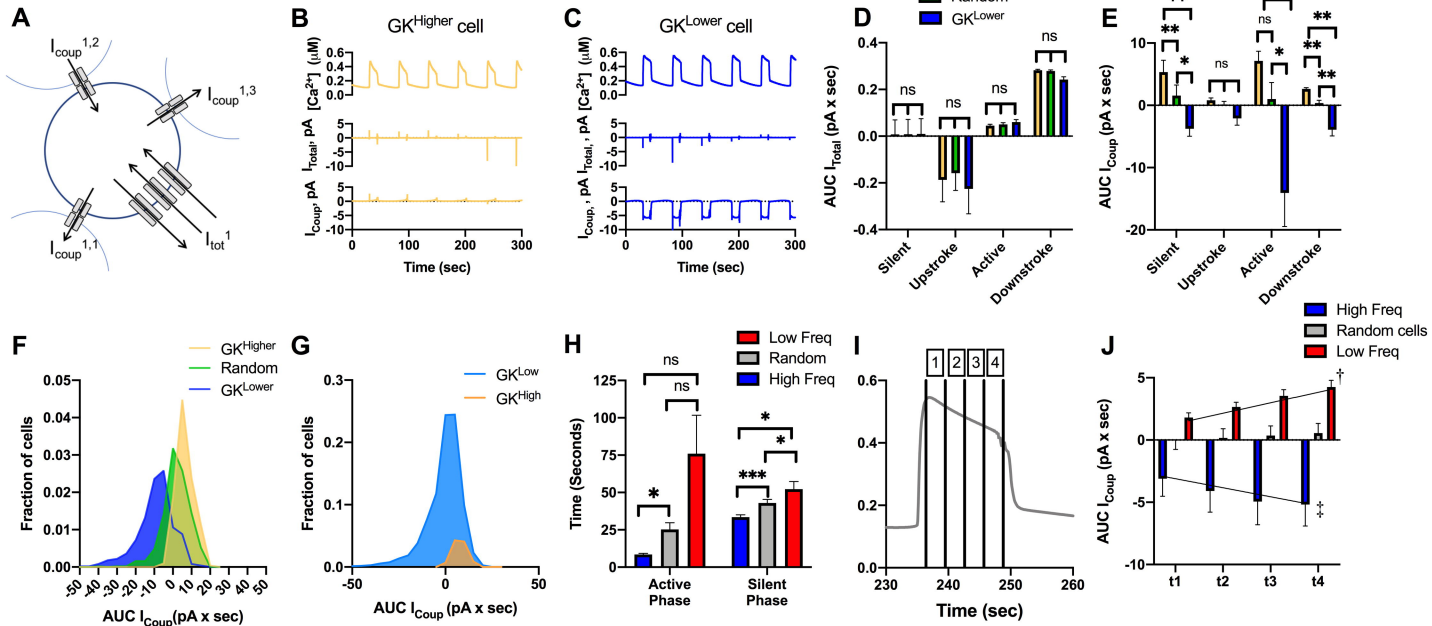

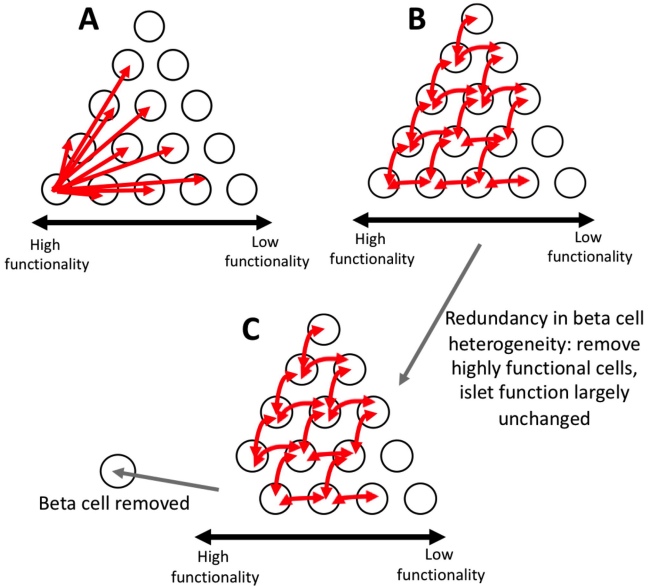

Source: https://www.biorxiv.org/content/10.1101/2020.10.28.358457v1.full.pdf
